# Supplementary material for: Efficient one-pot synthesis of [3]catenanes based on Pt(ii) metallacycles with a flexible building block
Source: Royal Society of Chemistry journal article supplement (doi:10.1039/d1qo00910a), 2021-01-01
Supplement: d1qo00910a1.pdf [file d1qo00910a1.pdf]

## Efficient one-pot synthesis of [3]catenanes based on Pt(II) metallacycles with a flexible building block

Yuan-Guang Shao,<sup>a</sup> Lang He,<sup>a</sup> Qian-Qian Mao,<sup>a</sup> Tao Hong,<sup>a</sup> Xin-Wen Ying,<sup>a</sup>  
Zibin Zhang,<sup>a</sup> Shijun Li\*<sup>a</sup> and Peter J. Stang\*<sup>b</sup>

<sup>a</sup>*College of Material, Chemistry and Chemical Engineering, Hangzhou Normal University,*

*Hangzhou 311121, P. R. China*

<sup>b</sup>*Department of Chemistry, University of Utah, 315 South 1400 East, Room 2020,*

*Salt Lake City, Utah 84112*

*Email address: l\_shijun@hznu.edu.cn; stang@chem.utah.edu*

## Table of Contents

1.  $^1\text{H}$  NMR,  $^{13}\text{C}$  NMR and mass spectra of **1a**
2.  $^1\text{H}$  NMR spectrum of **1b**
3.  $^1\text{H}$  NMR,  $^{31}\text{P}$  NMR and  $^1\text{H}$ - $^1\text{H}$  COSY NMR spectra of metallacycles **2a** and **2b**
4.  $^1\text{H}$  NMR and  $^{31}\text{P}$  NMR spectra of [3]catenane **3**, [3]catenane **4** and [3]catenane **5**
5. ESI-MS spectra of metallacycles **2a** and **2b**
6. ESI-MS spectra of [3]catenane **3**, [3]catenane **4** and [3]catenane **5**
7. Investigation of the host-guest complexation DB24C8 $\supset$ **1a**, DB30C10 $\supset$ **1a** and DB24C8 $\supset$ **1b**
8. Determination of binding constant ( $K_a$ ) using the UV-vis titration method
9. Crystal structure of **1b**
10. NMR spectra of [3]catenanes by using one-pot construction method
11. Synthesis and characterization of anion-exchanged metallacycles **7**, **8** and [3]catenanes **9**, **10**, **11**
12. X-ray analysis data of **1a** and [3]catenane **4**

1.  $^1\text{H}$  NMR,  $^{13}\text{C}$  NMR and mass spectra of **1a**

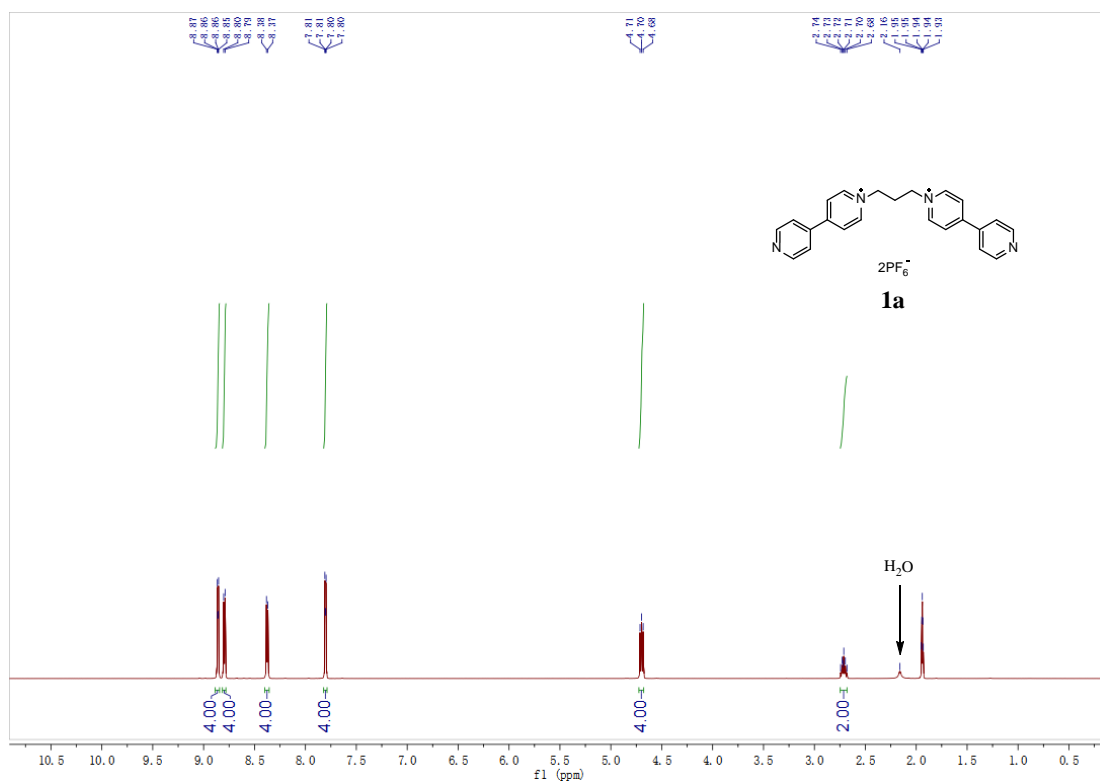

**Fig. S1**  $^1\text{H}$  NMR (500 MHz,  $\text{CD}_3\text{CN}$ , 25 °C) spectrum of **1a**.

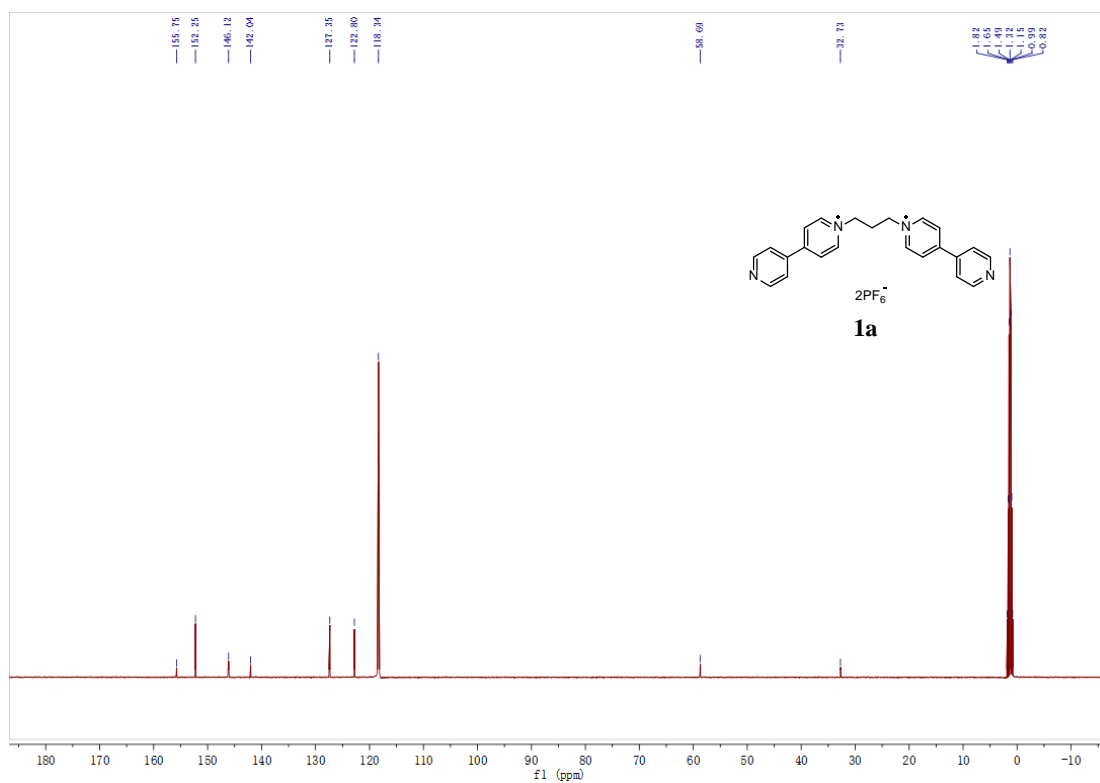

**Fig. S2**  $^{13}\text{C}\{^1\text{H}\}$  NMR (126 MHz,  $\text{CD}_3\text{CN}$ , 25 °C) spectrum of **1a**.

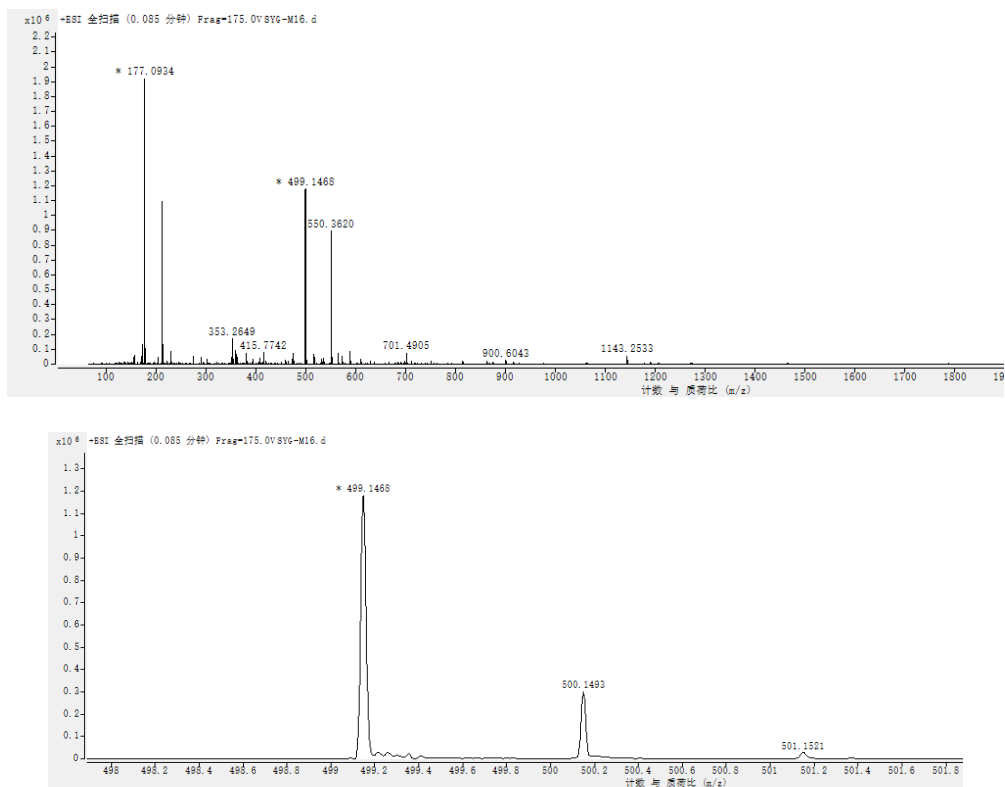

**Fig. S3** High resolution electrospray ionization mass spectrum of **1a**.  $m/z$  calcd. for  $C_{23}H_{22}F_6N_4P$  ( $[M - PF_6]^+$ ), 499.1481; found, 499.1468, error  $-2.6$  ppm.

## 2. $^1H$ NMR spectrum of **1b**

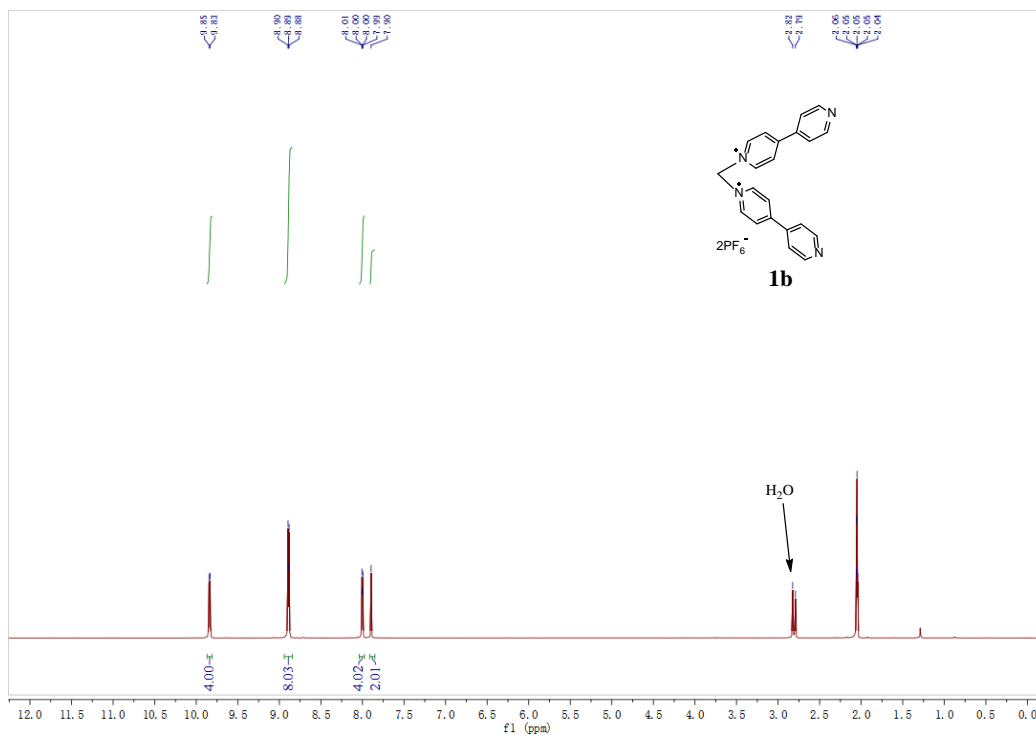

**Fig. S4**  $^1H$  NMR (500 MHz, acetone- $d_6$ , 25 °C) spectrum of **1b**.

3.  $^1\text{H}$  NMR,  $^{31}\text{P}$  NMR and  $^1\text{H}$ - $^1\text{H}$  COSY NMR spectra of metallacycles **2a** and **2b**

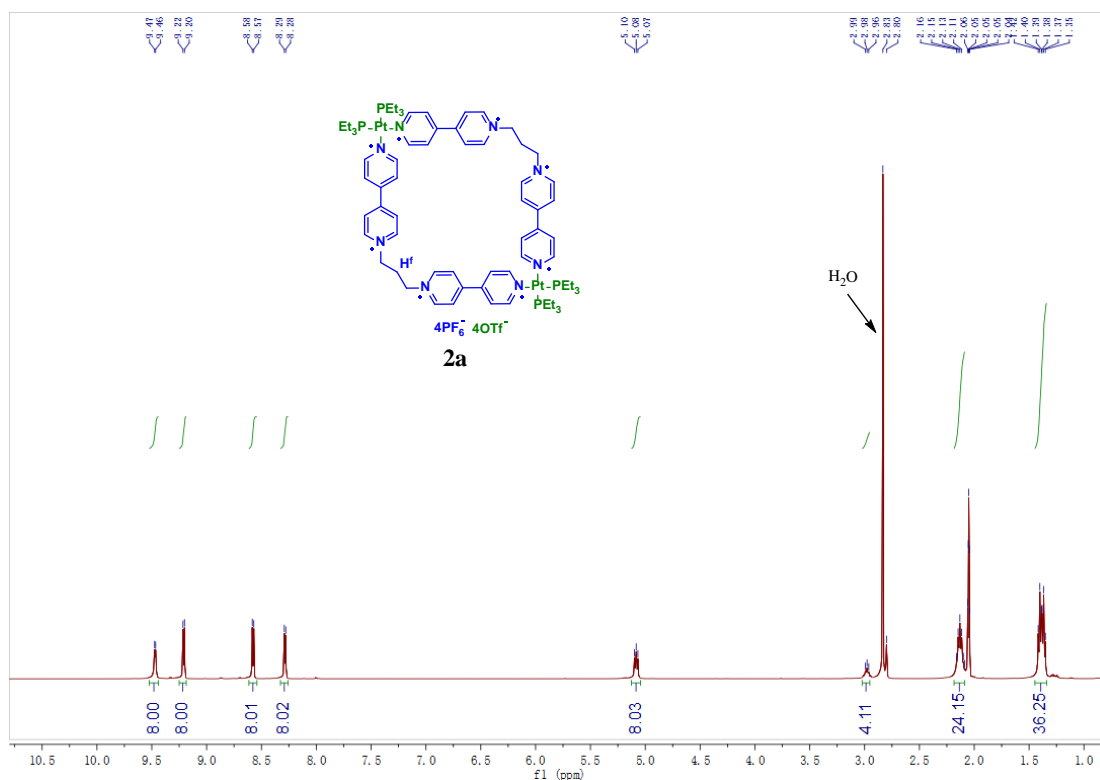

**Fig. S5**  $^1\text{H}$  NMR (500 MHz, acetone-*d*<sub>6</sub>, 25 °C) spectrum of metallacycle **2a**.

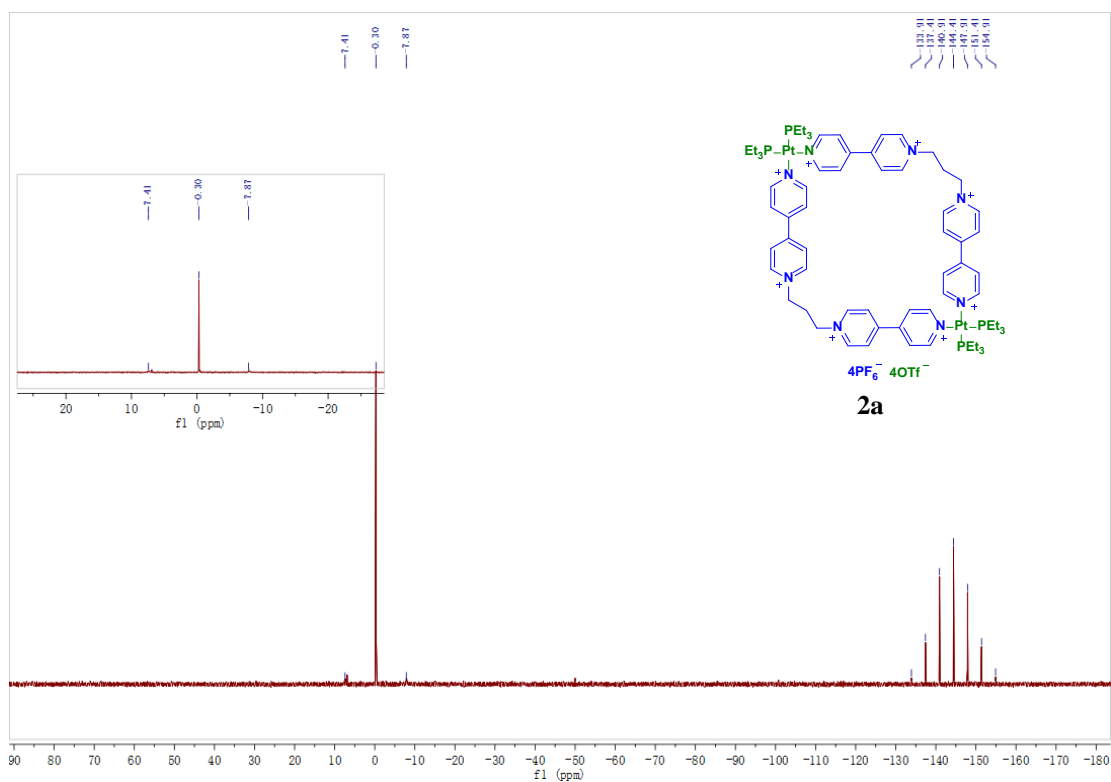

**Fig. S6**  $^{31}\text{P}\{^1\text{H}\}$  NMR (202 MHz, acetone-*d*<sub>6</sub>, 25 °C) spectrum of metallacycle **2a**.

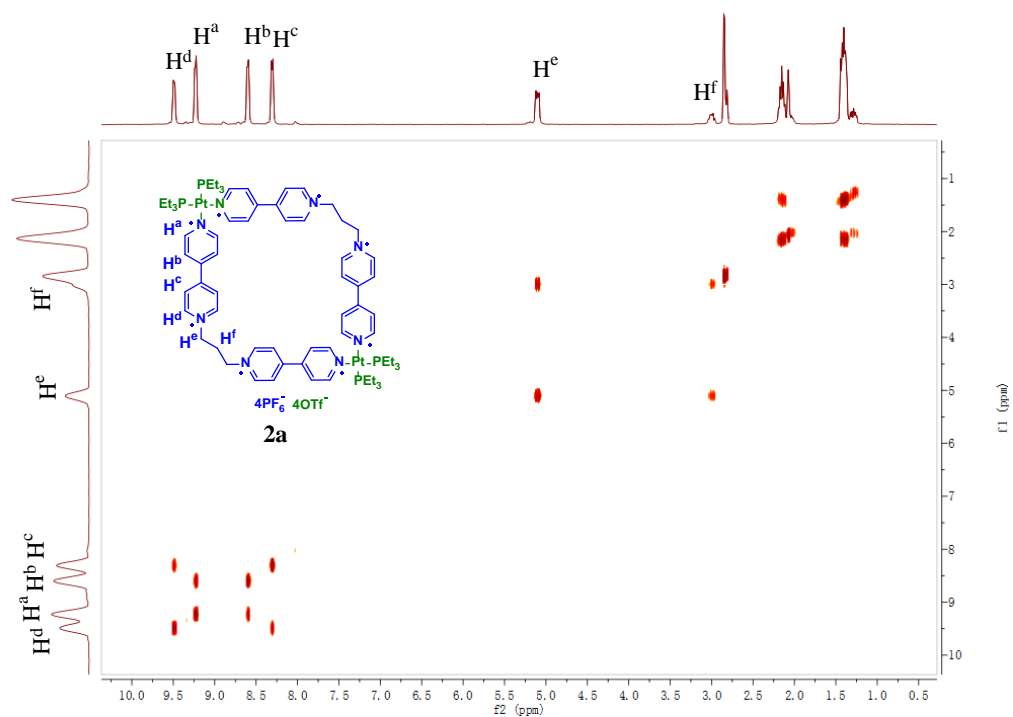

**Fig. S7**  $^1\text{H}$ - $^1\text{H}$  COSY NMR (500 MHz, acetone- $d_6$ , 25 °C) spectrum of metallacycle **2a**.

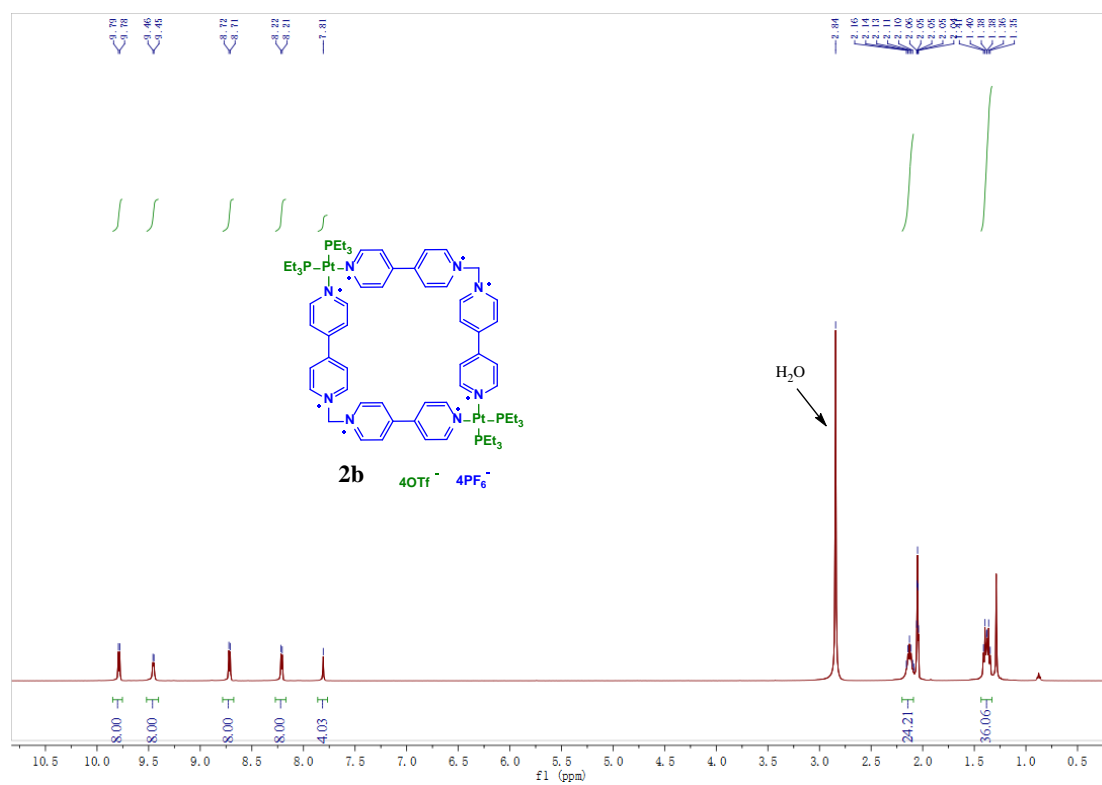

**Fig. S8**  $^1\text{H}$  NMR (500 MHz, acetone- $d_6$ , 25 °C) spectrum of metallacycle **2b**.

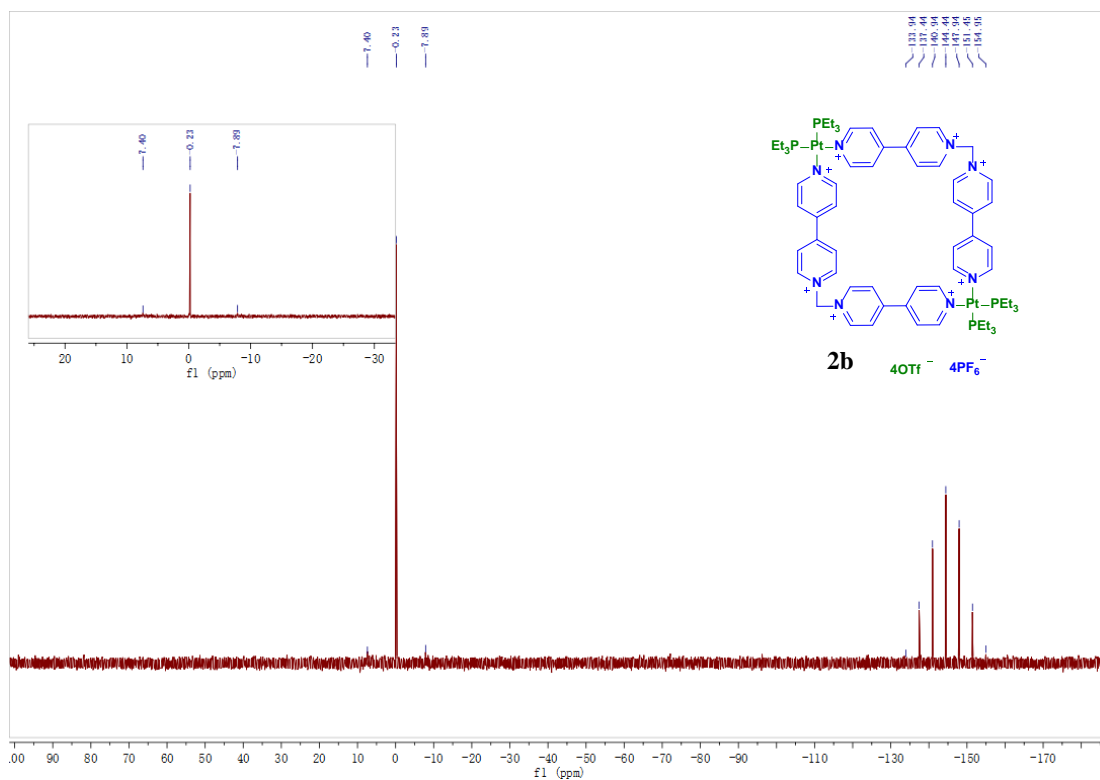

**Fig. S9**  $^{31}\text{P}\{^1\text{H}\}$  NMR (202 MHz, acetone- $d_6$ , 25 °C) spectrum of metallacycle **2b**.

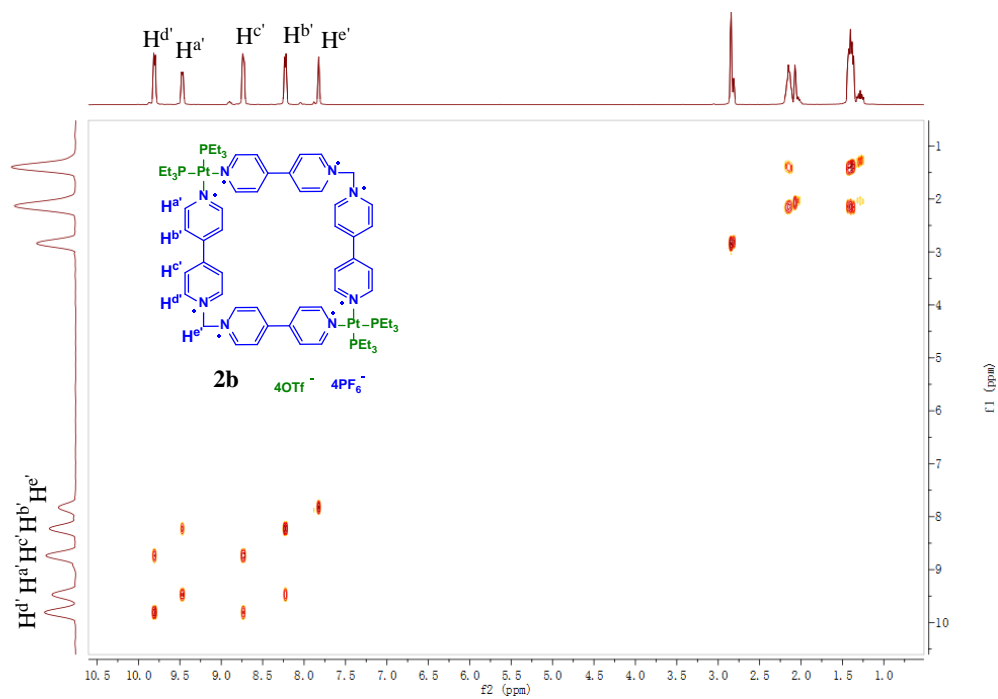

**Fig. S10**  $^1\text{H}$ - $^1\text{H}$  COSY NMR (500 MHz, acetone- $d_6$ , 25 °C) spectrum of metallacycle **2b**.

4.  $^1\text{H}$  NMR and  $^{31}\text{P}$  NMR spectra of [3]catenane **3**, [3]catenane **4** and [3]catenane **5**

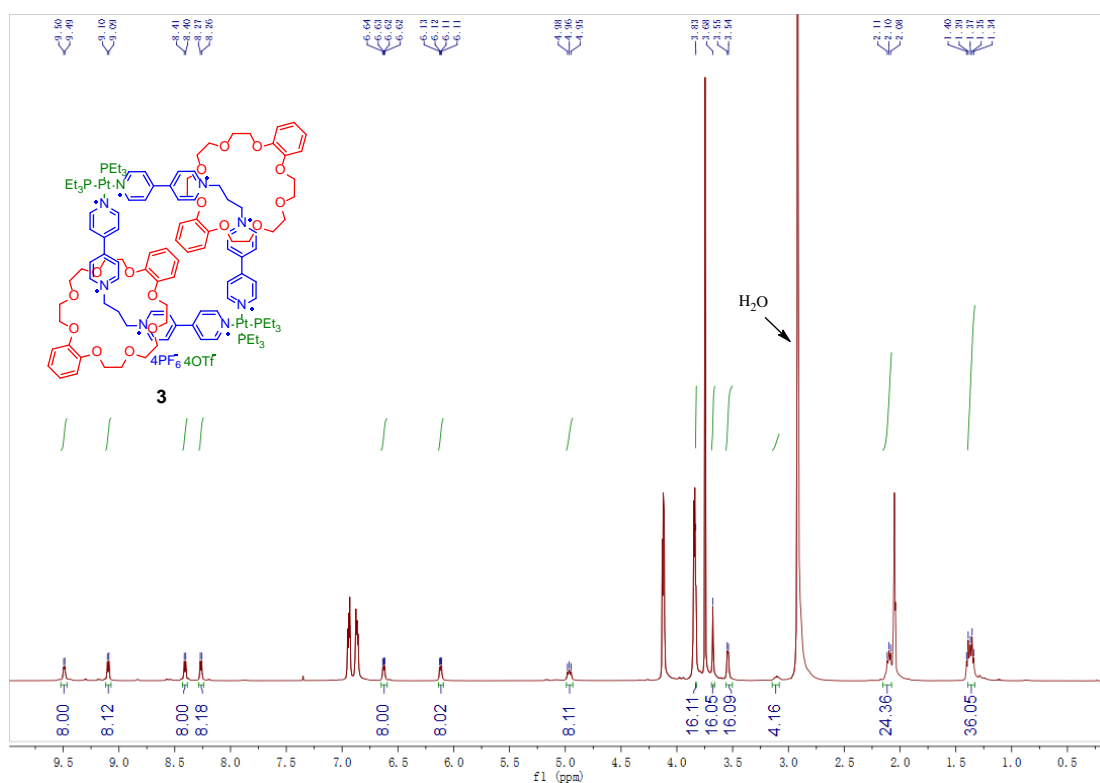

**Fig. S11**  $^1\text{H}$  NMR (500 MHz, acetone- $d_6$ , 25 °C) spectrum of [3]catenane **3**.

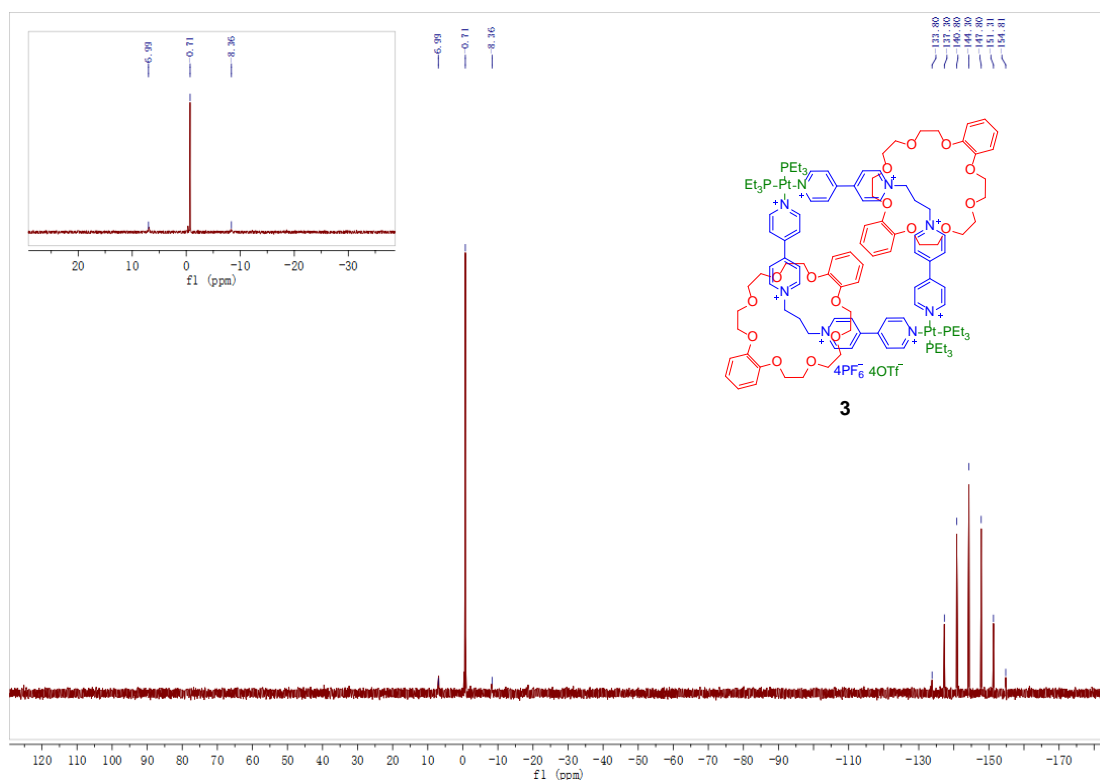

**Fig. S12**  $^{31}\text{P}\{^1\text{H}\}$  NMR (202 MHz, acetone- $d_6$ , 25 °C) spectrum of [3]catenane **3**.



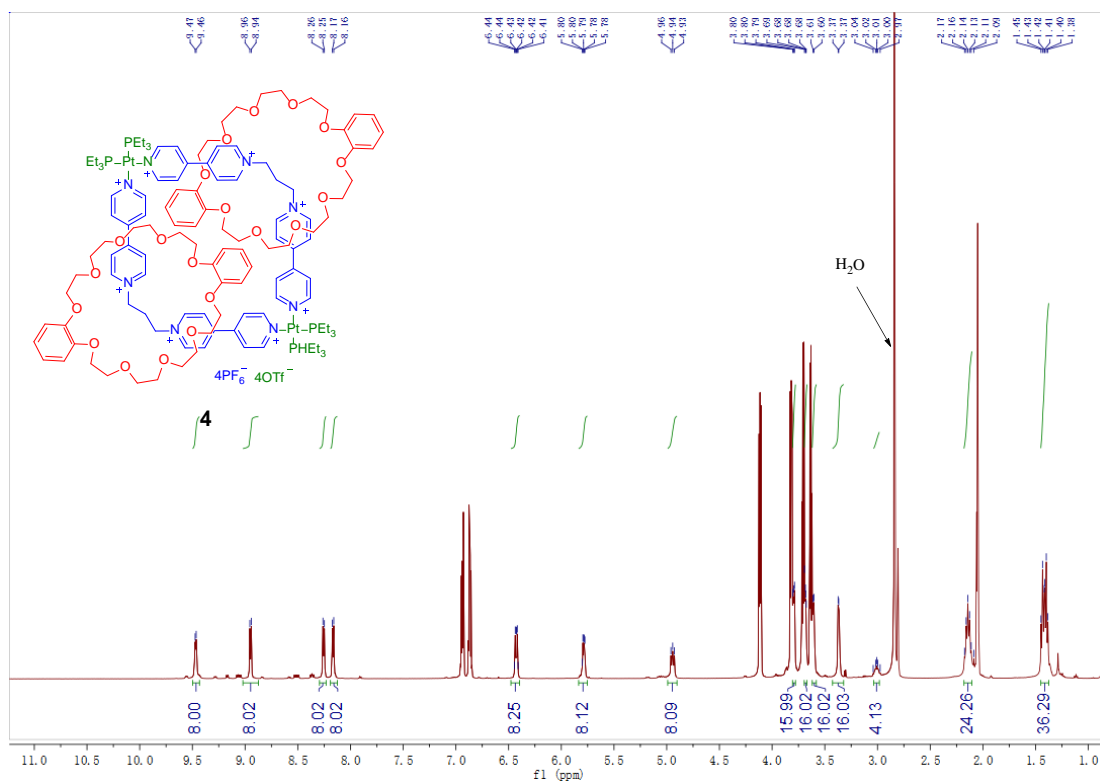

**Fig. S13** <sup>1</sup>H NMR (500 MHz, acetone-d<sub>6</sub>, 25 °C) spectrum of [3]catenane **4**.

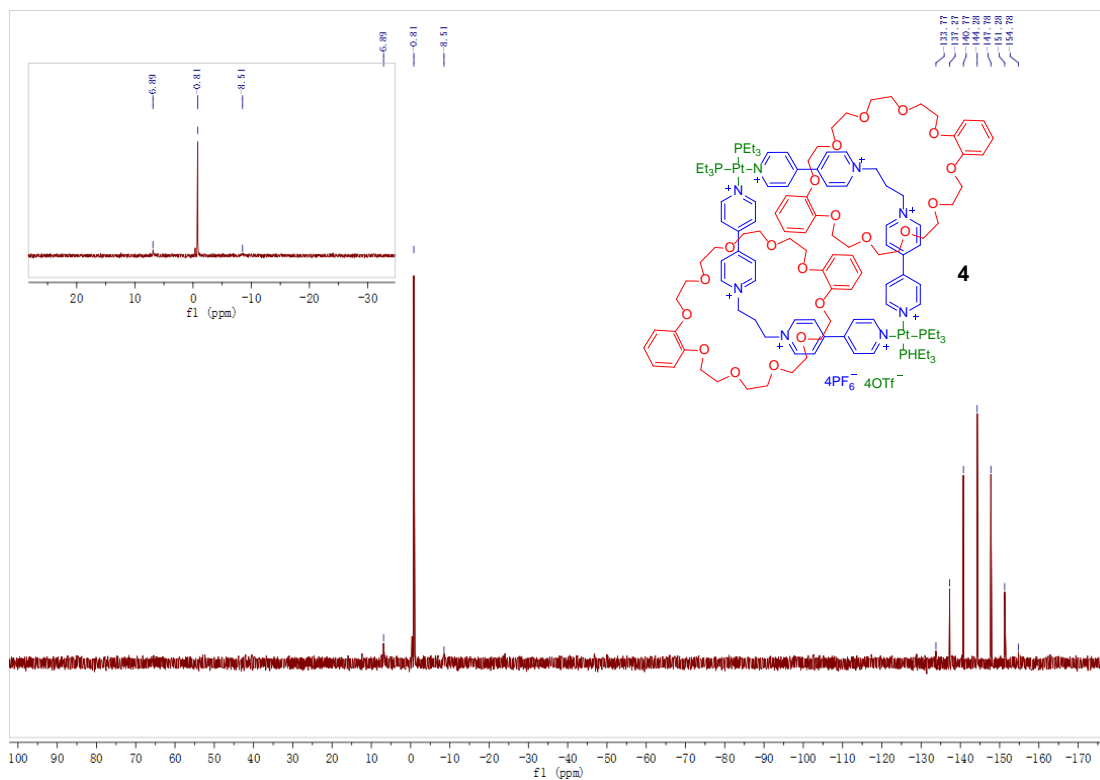

**Fig. S14** <sup>31</sup>P{<sup>1</sup>H} NMR (202 MHz, acetone-d<sub>6</sub>, 25 °C) spectrum of [3]catenane **4**.

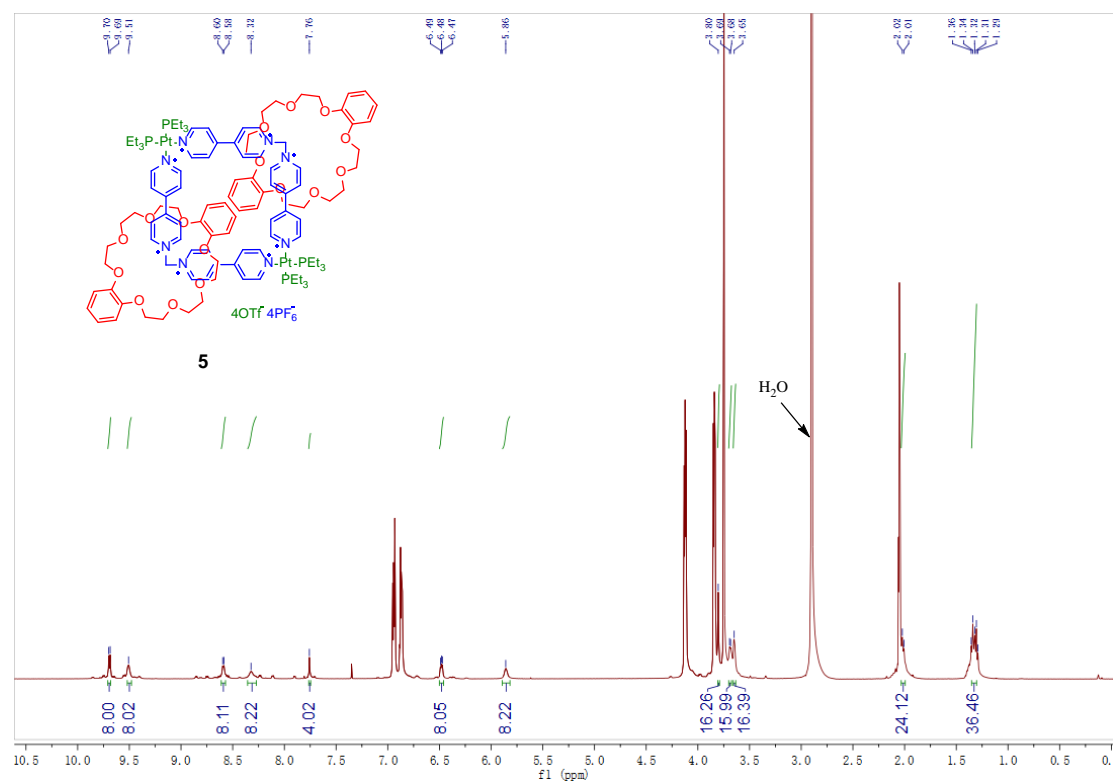

**Fig. S15** <sup>1</sup>H NMR (500 MHz, acetone-*d*<sub>6</sub>, 25 °C) spectrum of [3]catenane **5**.

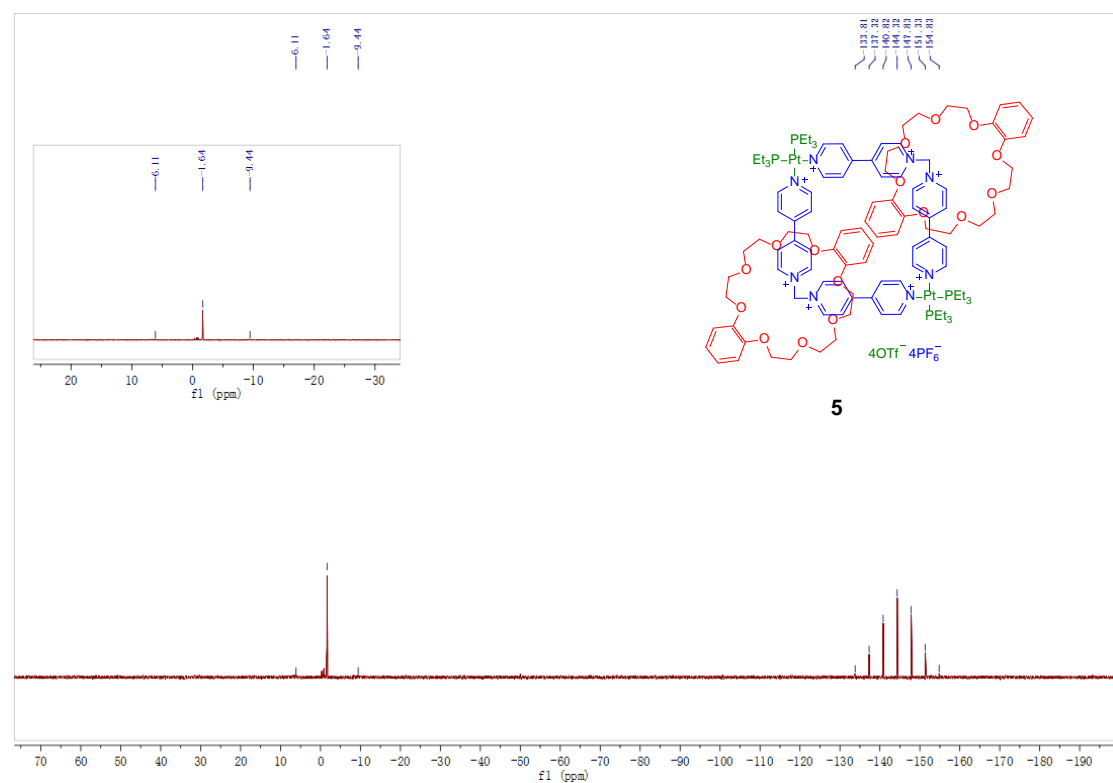

**Fig. S16** <sup>31</sup>P{<sup>1</sup>H} NMR (202 MHz, acetone-*d*<sub>6</sub>, 25 °C) spectrum of [3]catenane **5**.

## 5. ESI-MS spectra of metallacycles **2a** and **2b**

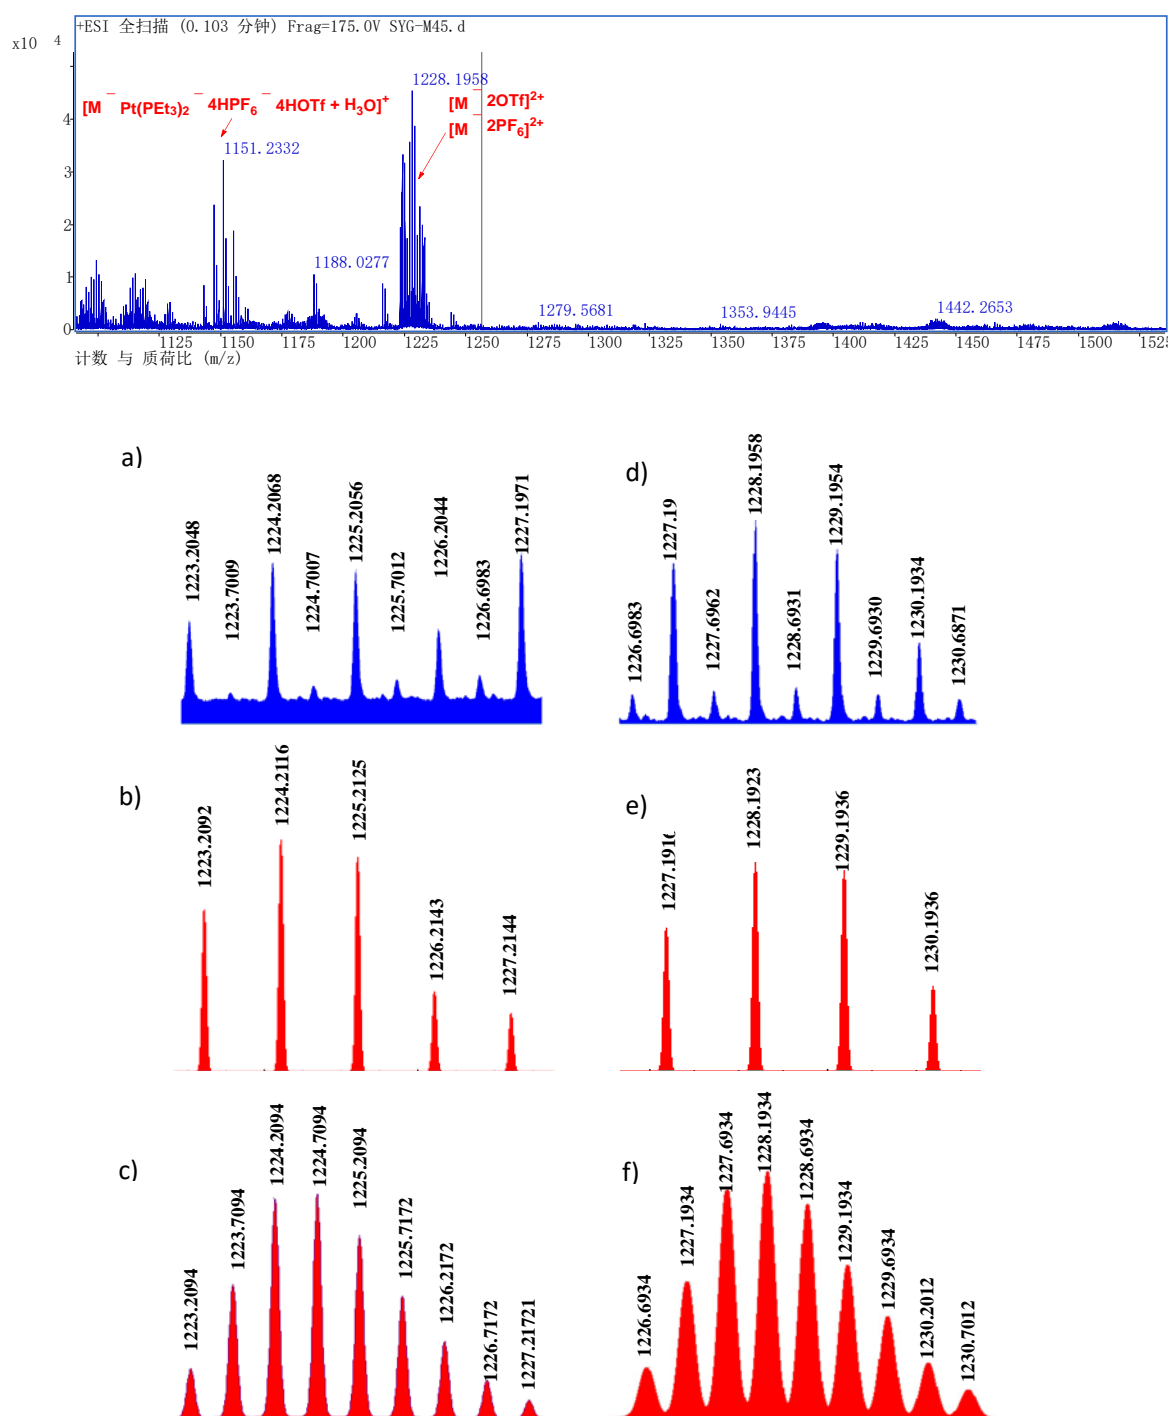

**Fig. S17** ESI-MS spectrum of **2a**. a) experimental spectrum of  $[2a - 2OTf]^{2+}$  ( $m/z = 1224.2068$ ) and its fragment  $[1a + 6 - OTf]^+$  ( $m/z = 1224.2068$ ); b) simulated spectrum of the fragment  $[1a + 6 - OTf]^+$ ; c) simulated spectrum of  $[2a - 2OTf]^{2+}$ ; d) experimental spectrum of  $[2a - 2PF_6]^{2+}$  ( $m/z = 1228.1958$ ) and its fragment  $[1a + 6 - PF_6]^+$  ( $m/z = 1228.1958$ ); e) simulated spectrum of the fragment  $[1a + 6 - PF_6]^+$ ; f) simulated spectrum of  $[2a - 2PF_6]^{2+}$ .

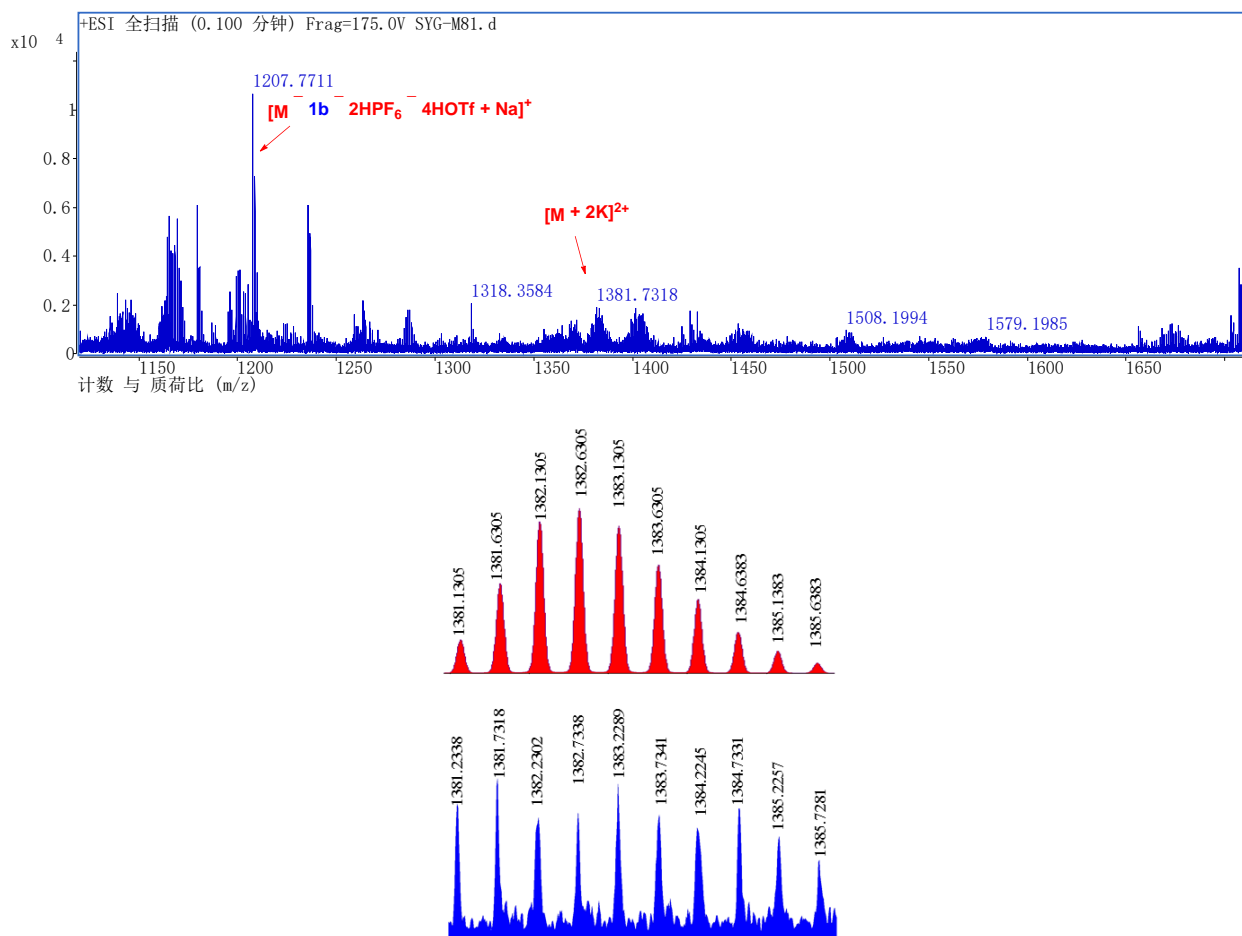

**Fig. S18** ESI-MS spectrum of  $[2b + 2K]^{2+}$  ( $m/z = 1383.2289$ ) (blue), and its simulated spectrum (red).

## 6. ESI-MS spectra of [3]catenane 3, [3]catenane 4 and [3]catenane 5

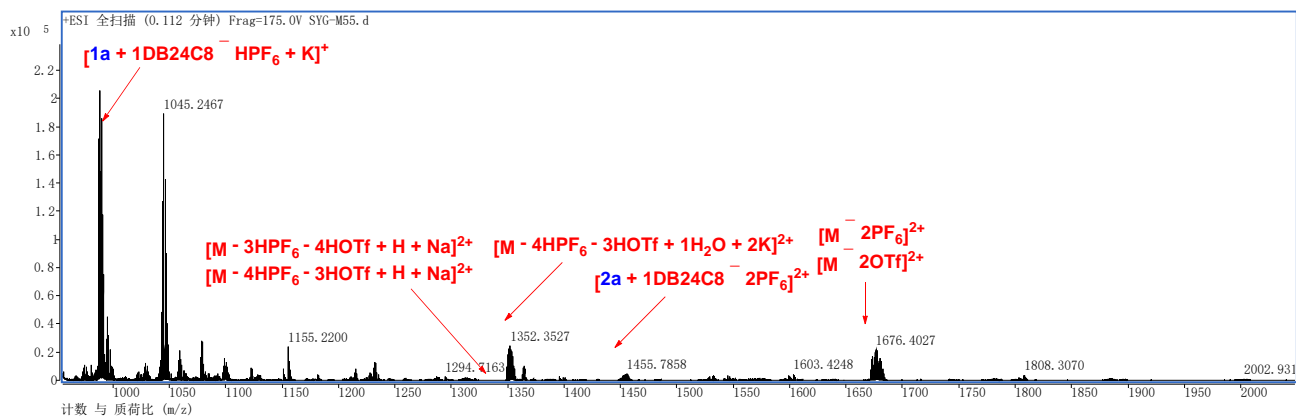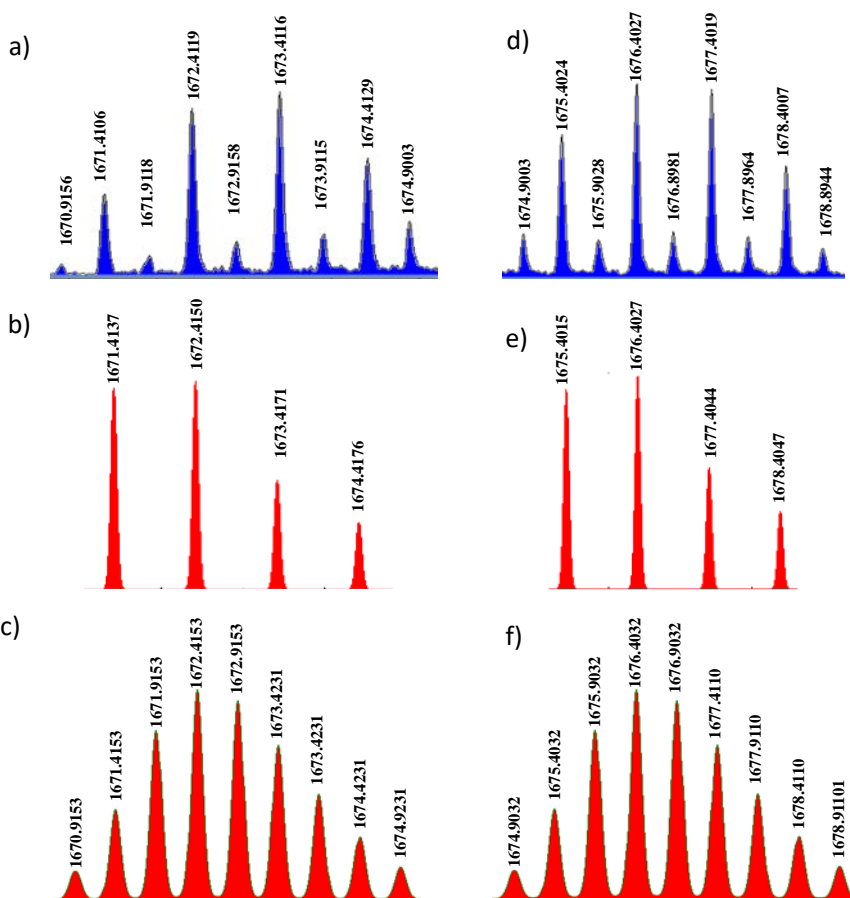

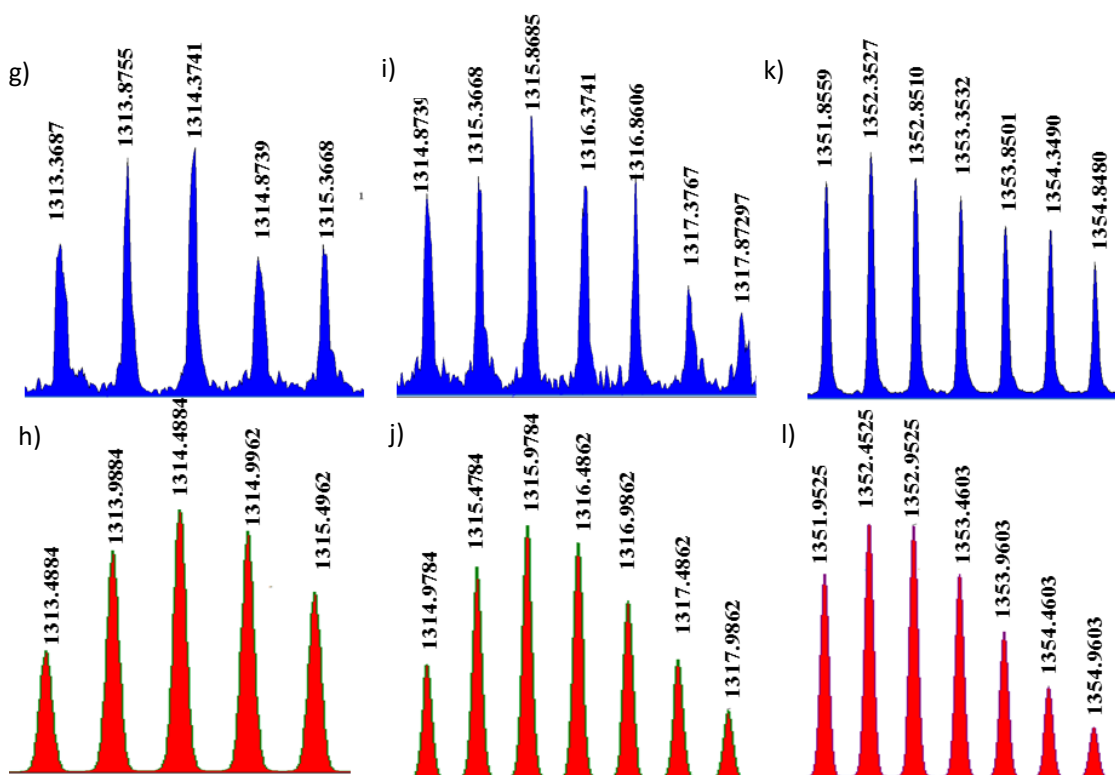

**Fig. S19** ESI-MS spectrum of **3**. a) experimental spectrum of  $[\mathbf{3} - 2\text{OTf}]^{2+}$  ( $m/z = 1672.4119$ ) and its fragment  $[\mathbf{1a} + \mathbf{6} + \text{DB24C8} - \text{OTf}]^+$  ( $m/z = 1672.4119$ ); b) simulated spectrum of the fragment  $[\mathbf{1a} + \mathbf{6} + \text{DB24C8} - \text{OTf}]^+$ ; c) simulated spectrum of  $[\mathbf{3} - 2\text{OTf}]^{2+}$ ; d) experimental spectrum of  $[\mathbf{3} - 2\text{PF}_6]^{2+}$  ( $m/z = 1676.4027$ ) and its fragment  $[\mathbf{1a} + \mathbf{6} + \text{DB24C8} - \text{PF}_6]^+$  ( $m/z = 1676.4027$ ); e) simulated spectrum of the fragment  $[\mathbf{1a} + \mathbf{6} + \text{DB24C8} - \text{PF}_6]^+$ ; f) simulated spectrum of  $[\mathbf{3} - 2\text{PF}_6]^{2+}$ ; g) experimental spectrum of  $[\mathbf{3} - 3\text{HPF}_6 - 4\text{HOTf} + \text{H} + \text{Na}]^{2+}$  ( $m/z = 1314.3741$ ); h) simulated spectrum of  $[\mathbf{3} - 3\text{HPF}_6 - 4\text{HOTf} + \text{H} + \text{Na}]^{2+}$  ( $m/z = 1314.4884$ ); i) experimental spectrum of  $[\mathbf{3} - 4\text{HPF}_6 - 3\text{HOTf} + \text{H} + \text{Na}]^{2+}$  ( $m/z = 1316.3741$ ); j) simulated spectrum of  $[\mathbf{3} - 4\text{HPF}_6 - 3\text{HOTf} + \text{H} + \text{Na}]^{2+}$  ( $m/z = 1316.4862$ ); k) experimental spectrum of  $[\mathbf{3} - 4\text{HPF}_6 - 3\text{HOTf} + 1\text{H}_2\text{O} + 2\text{K}]^{2+}$  ( $m/z = 1352.8510$ ); l) simulated spectrum of  $[\mathbf{3} - 4\text{HPF}_6 - 3\text{HOTf} + 1\text{H}_2\text{O} + 2\text{K}]^{2+}$  ( $m/z = 1352.9525$ ).

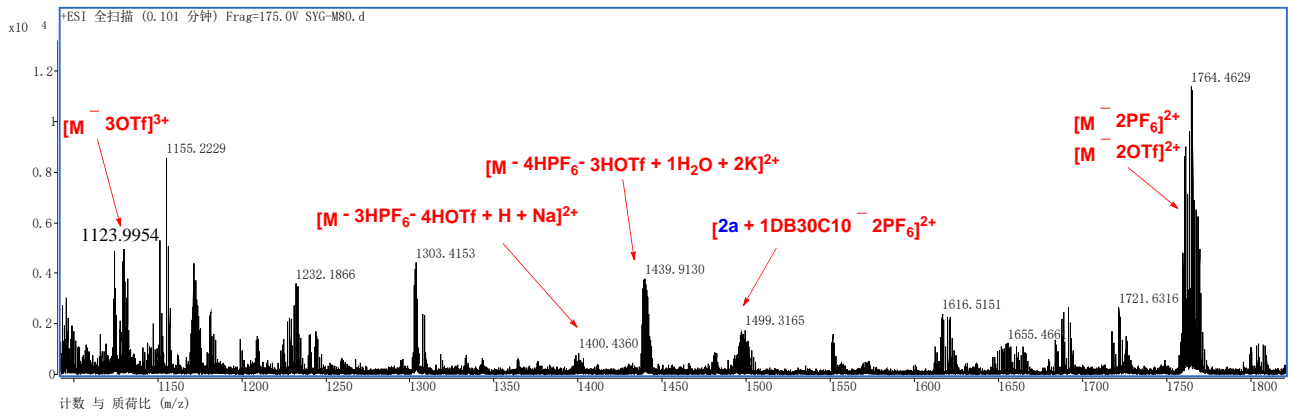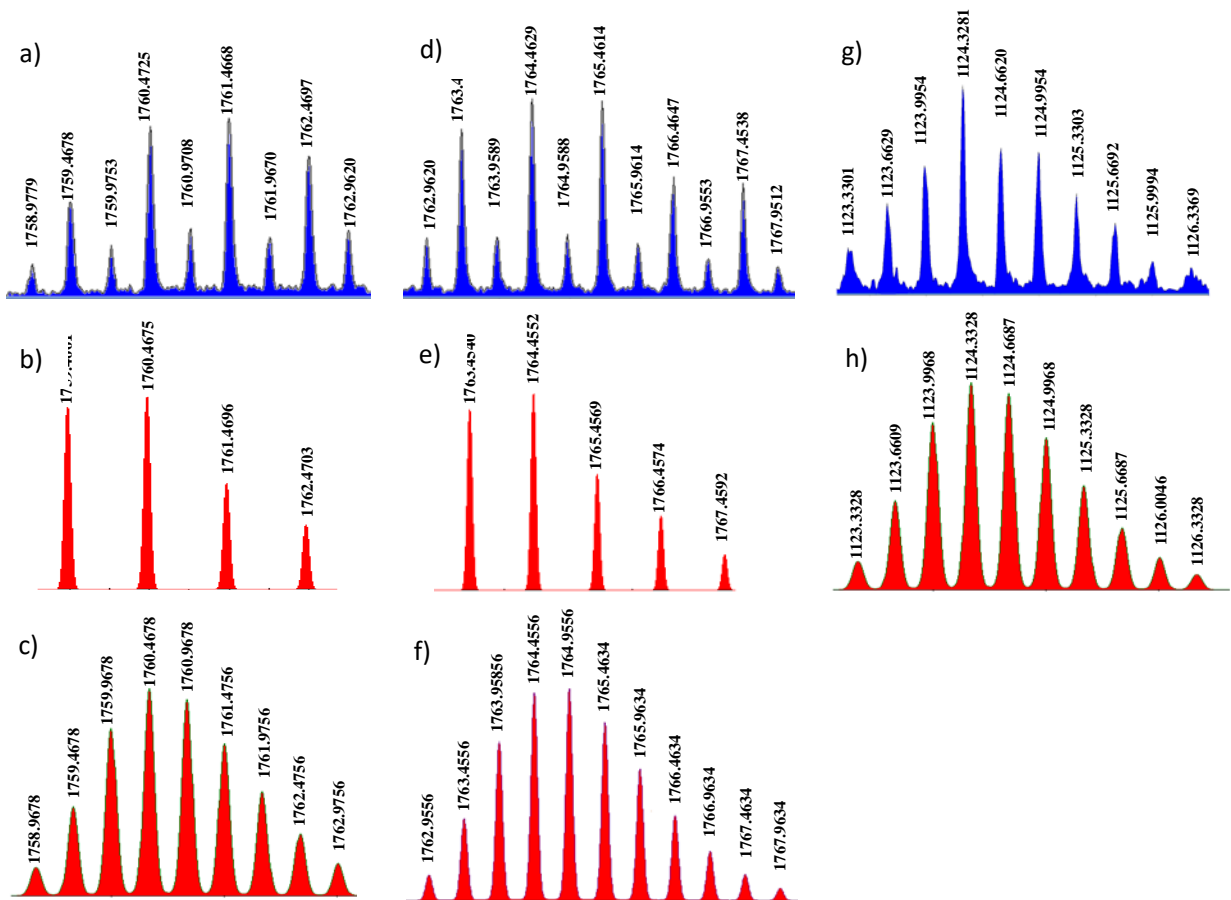

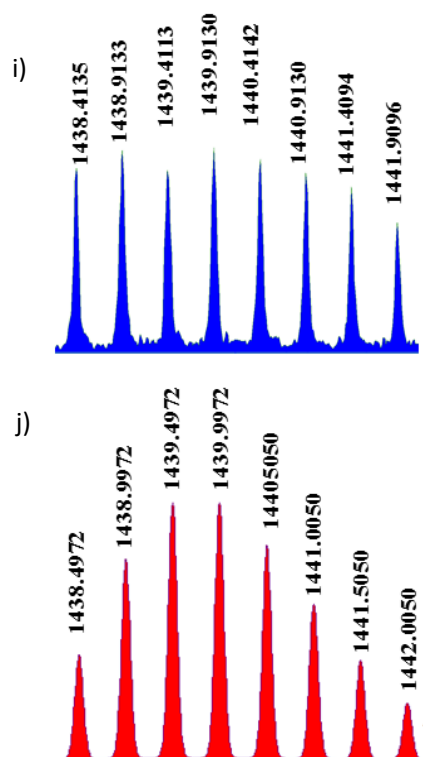

**Fig. S20** ESI-MS spectrum of **4**. a) experimental spectrum of  $[\mathbf{4} - 2\text{OTf}]^{2+}$  ( $m/z = 1760.4725$ ) and its fragment  $[\mathbf{1a} + \mathbf{6} + \text{DB30C10} - \text{OTf}]^+$  ( $m/z = 1760.4725$ ); b) simulated spectrum of the fragment  $[\mathbf{1a} + \mathbf{6} + \text{DB30C10} - \text{OTf}]^+$ ; c) simulated spectrum of  $[\mathbf{4} - 2\text{OTf}]^{2+}$ ; d) experimental spectra of  $[\mathbf{4} - 2\text{PF}_6]^{2+}$  ( $m/z = 1764.4629$ ) and its fragment  $[\mathbf{1a} + \mathbf{6} + \text{DB30C10} - \text{PF}_6]^+$  ( $m/z = 1764.4629$ ); e) simulated spectrum of the fragment  $[\mathbf{1a} + \mathbf{6} + \text{DB30C10} - \text{PF}_6]^+$ ; f) simulated spectrum of  $[\mathbf{4} - 2\text{PF}_6]^{2+}$ ; g) experimental spectrum of  $[\mathbf{4} - 3\text{OTf}]^{3+}$  ( $m/z = 1123.9954$ ); h) simulated spectrum of  $[\mathbf{4} - 3\text{OTf}]^{3+}$ ; i) experimental spectrum of  $[\mathbf{4} - 4\text{HPF}_6 - 3\text{HOTf} + 1\text{H}_2\text{O} + 2\text{K}]^{2+}$  ( $m/z = 1440.4142$ ); j) simulated spectrum of  $[\mathbf{4} - 4\text{HPF}_6 - 3\text{HOTf} + 1\text{H}_2\text{O} + 2\text{K}]^{2+}$  ( $m/z = 1440.5050$ ).

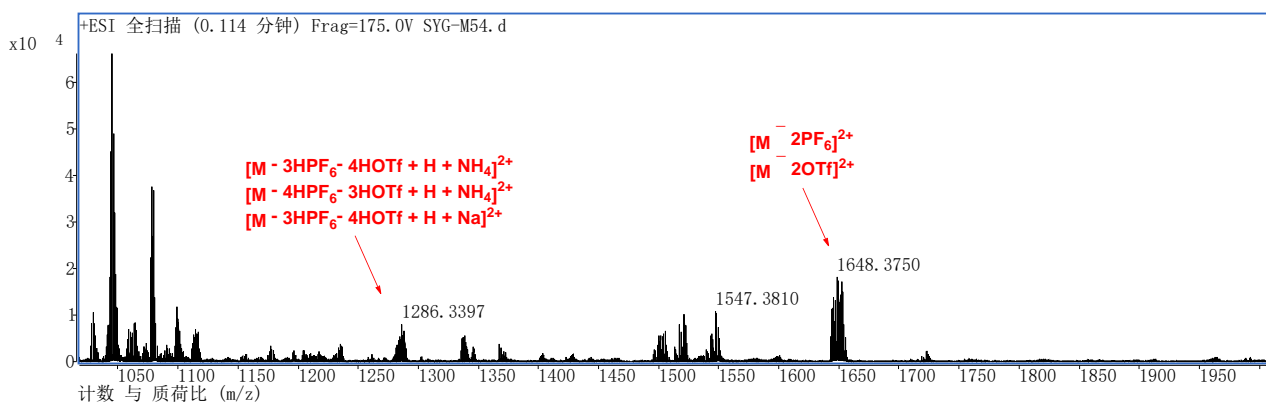



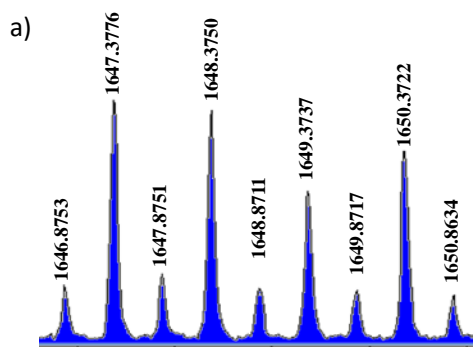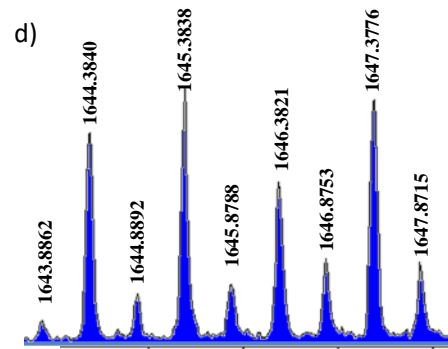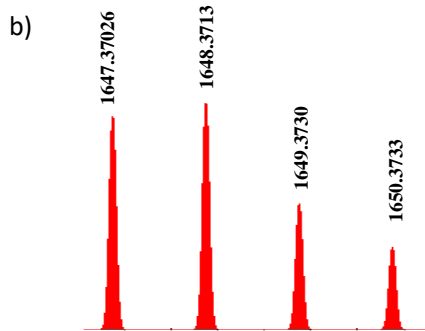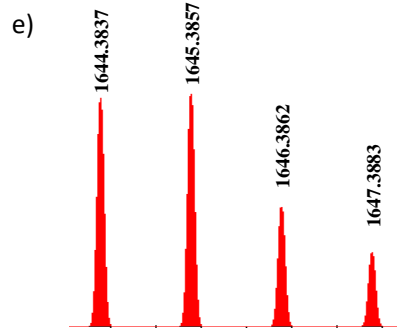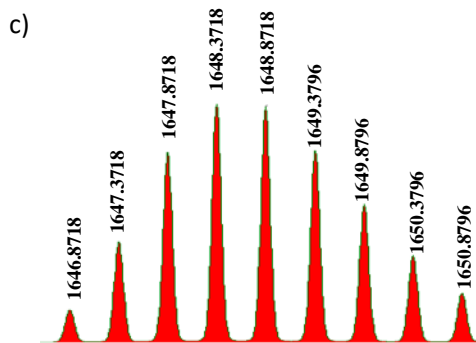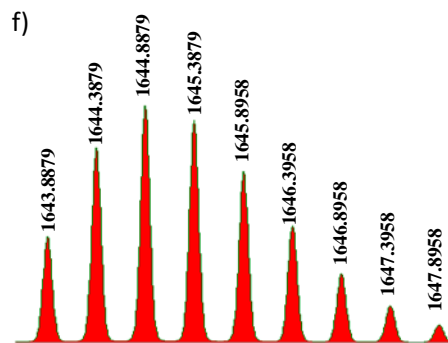

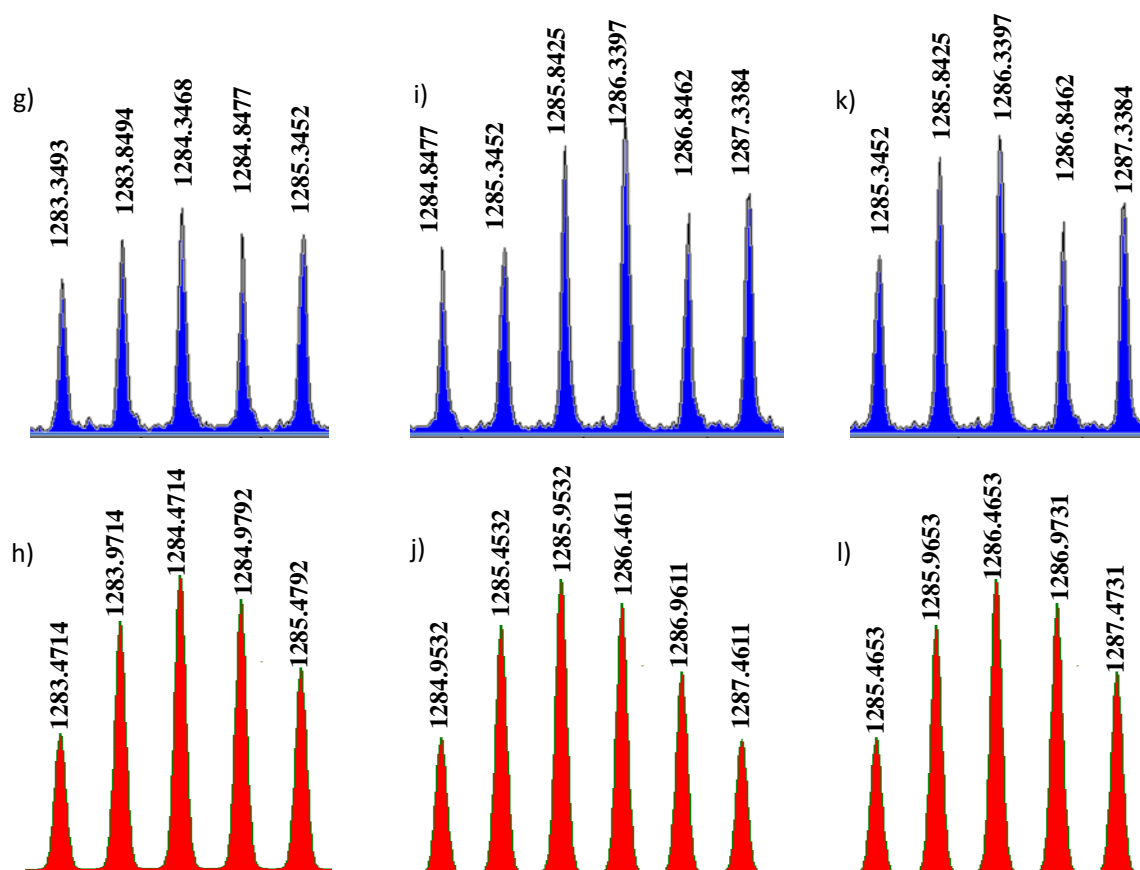

**Fig. S21** ESI-MS spectrum of **5**. a) experimental spectrum of  $[\mathbf{5} - 2\text{PF}_6]^{2+}$  ( $m/z = 1648.3750$ ) and its fragment  $[\mathbf{1b} + \mathbf{6} + \text{DB24C8} - \text{PF}_6]^+$  ( $m/z = 1648.3750$ ); b) simulated spectrum of the fragment  $[\mathbf{1b} + \mathbf{6} + \text{DB24C8} - \text{PF}_6]^+$ ; c) simulated spectrum of  $[\mathbf{5} - 2\text{PF}_6]^{2+}$ ; d) experimental spectrum of  $[\mathbf{5} - 2\text{OTf}]^{2+}$  ( $m/z = 1644.3840$ ) and its fragment  $[\mathbf{1b} + \mathbf{6} + \text{DB24C8} - \text{OTf}]^+$  ( $m/z = 1644.3837$ ); e) simulated spectrum of the fragment  $[\mathbf{1b} + \mathbf{6} + \text{DB24C8} - \text{OTf}]^+$ ; f) simulated spectrum of  $[\mathbf{5} - 2\text{OTf}]^{2+}$ ; g) experimental spectrum of  $[\mathbf{5} - 3\text{HPF}_6 - 4\text{HOTf} + \text{H} + \text{NH}_4]^{2+}$  ( $m/z = 1283.8494$ ); h) simulated spectrum of  $[\mathbf{5} - 3\text{HPF}_6 - 4\text{HOTf} + \text{H} + \text{NH}_4]^{2+}$  ( $m/z = 1283.9714$ ); i) experimental spectrum of  $[\mathbf{5} - 4\text{HPF}_6 - 3\text{HOTf} + \text{H} + \text{NH}_4]^{2+}$  ( $m/z = 1285.8425$ ); j) simulated spectrum of  $[\mathbf{5} - 4\text{HPF}_6 - 3\text{HOTf} + \text{H} + \text{NH}_4]^{2+}$  ( $m/z = 1285.9532$ ); k) experimental spectrum of  $[\mathbf{5} - 3\text{HPF}_6 - 4\text{HOTf} + \text{H} + \text{Na}]^{2+}$  ( $m/z = 1286.3397$ ); l) simulated spectrum of  $[\mathbf{5} - 3\text{HPF}_6 - 4\text{HOTf} + \text{H} + \text{Na}]^{2+}$  ( $m/z = 1286.4653$ ).

7. Investigation of the host-guest complexation  $\text{DB24C8} \supset \mathbf{1a}$ ,  $\text{DB30C10} \supset \mathbf{1a}$  and  $\text{DB24C8} \supset \mathbf{1b}$

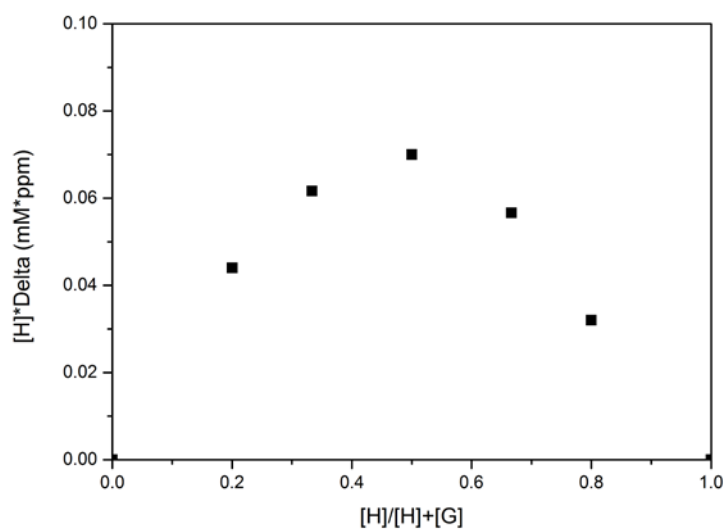

**Fig. S22** Job plot showing the 1:1 stoichiometry of the complex between **DB24C8** and the guest **1a** using  $^1\text{H}$  NMR data of  $\text{H}^2$  on **DB24C8**.  $[\text{DB24C8}]_0 + [\mathbf{1a}]_0 = 5.00$  mM in  $\text{CD}_3\text{COCD}_3$ .  $[\text{DB24C8}]_0$  and  $[\mathbf{1a}]_0$  are initial concentrations of **DB24C8** and **1a**.

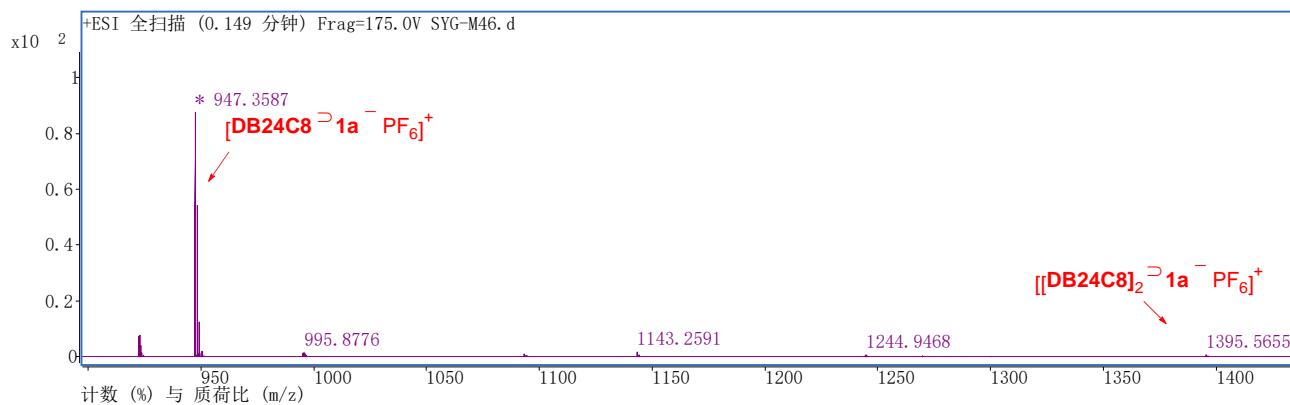

**Fig. S23** HRESI mass spectrum of a mixed solution of **1a** and **DB24C8** (1:1 molar ratio).  $m/z = 947.3587$  for  $[\text{DB24C8} \supset \mathbf{1a} - \text{PF}_6]^+$ , and  $m/z = 1395.5655$  for  $[(\text{DB24C8})_2 \supset \mathbf{1a} - \text{PF}_6]^+$ .

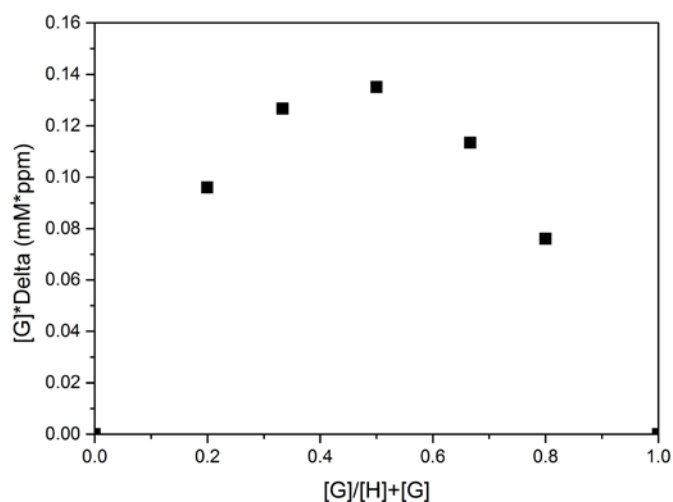

**Fig. S24** Job plot showing the 1:1 stoichiometry of the complex between **DB30C10** and the guest **1a** using  $^1\text{H}$  NMR data of  $\text{H}^b$  on **1a**.  $[\text{DB30C10}]_0 + [\mathbf{1a}]_0 = 5.00$  mM in  $\text{CD}_3\text{COCD}_3$ .  $[\text{DB30C10}]_0$  and  $[\mathbf{1a}]_0$  are initial concentrations of **DB30C10** and **1a**.

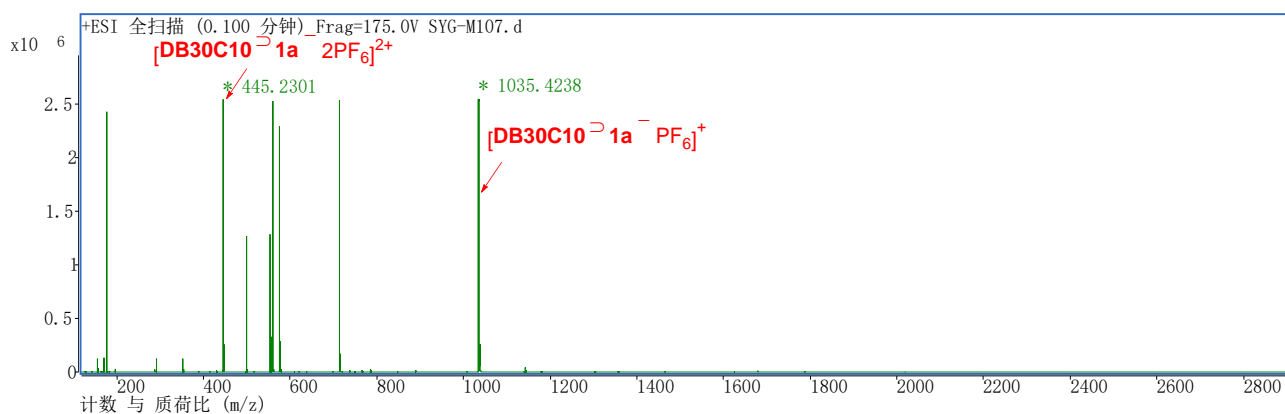

**Fig. S25** HRESI mass spectrum of a mixed solution of **1a** and **DB30C10** (1:1 molar ratio).  $m/z = 1035.4238$  for  $[\text{DB30C10} \supset \mathbf{1a} - \text{PF}_6]^+$ , and  $m/z = 445.2301$  for  $[\text{DB30C10} \supset \mathbf{1a} - 2\text{PF}_6]^{2+}$ .

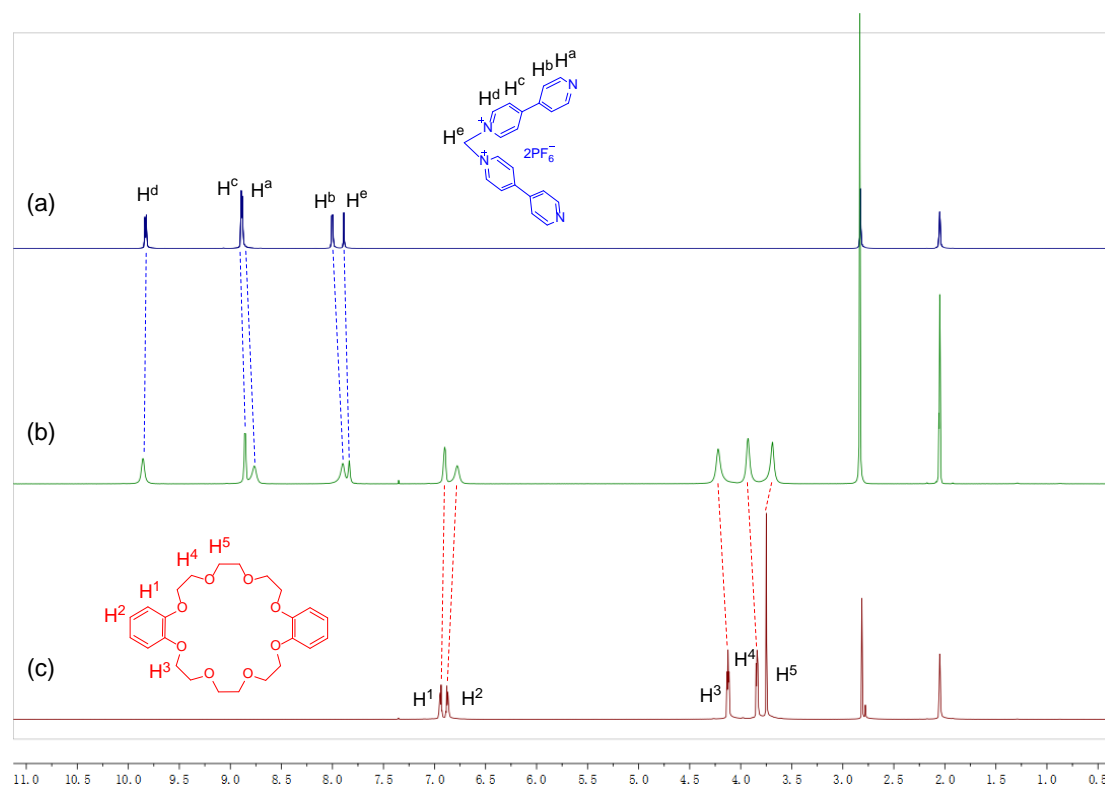

**Fig. S26**  $^1\text{H}$  NMR (500 MHz, acetone- $d_6$ , 25 °C) spectrum of (a) 12.00 mM **1b**, (b) 12.00 mM **1b** + 12.00 mM **DB24C8**, (c) 12.00 mM **DB24C8**.

#### 8. Determination of binding constant ( $K_a$ ) using the UV-vis titration method

Procedures for UV-vis titration: A 0.04 mM solution of guest **1a** in acetonitrile, and a solution of host (DB24C8 or DB30C10, 20 mM) with guest **1a** (0.04 mM) in acetonitrile were separately prepared. The guest solution (2 mL) was then titrated with the concentrated host solution that contained the guest. Upon each addition, the solution was balanced for more than 1 min before recording the spectrum. The error involved was assumed to be negligible owing to the total change in concentration of the host was small over the course of the titration. The association constants were determined by using the nonlinear least squares fitting of the titration curves and plotting the absorbance  $A$  at the host-guest complex charge-transfer band against the concentration of the host. The titration curve was well fitted to the expression of a 1:1 binding isotherm.

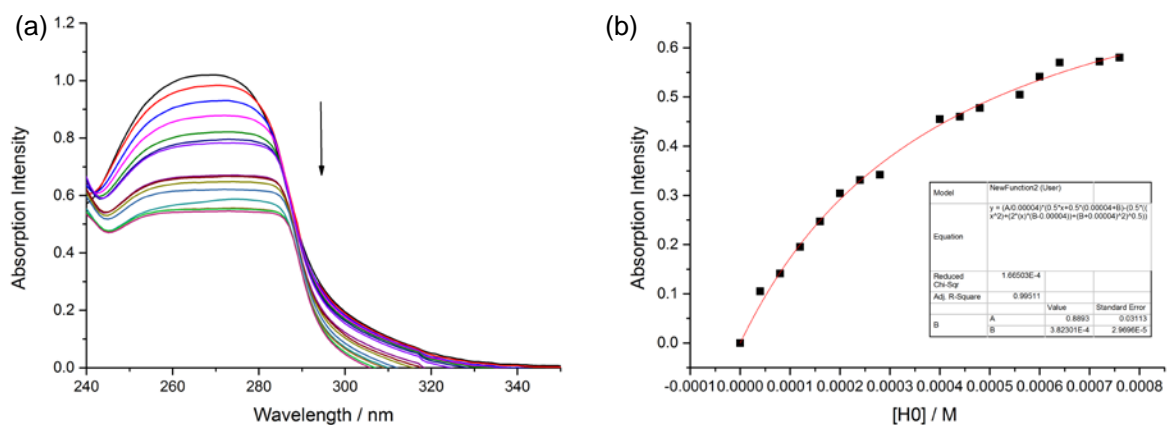

**Fig. S27** (a) The absorption spectral changes of **1a** (0.04 mM) upon the addition of **DB24C8** and (b) the absorption intensity changes at  $\lambda = 270$  nm upon the addition of **DB24C8**.

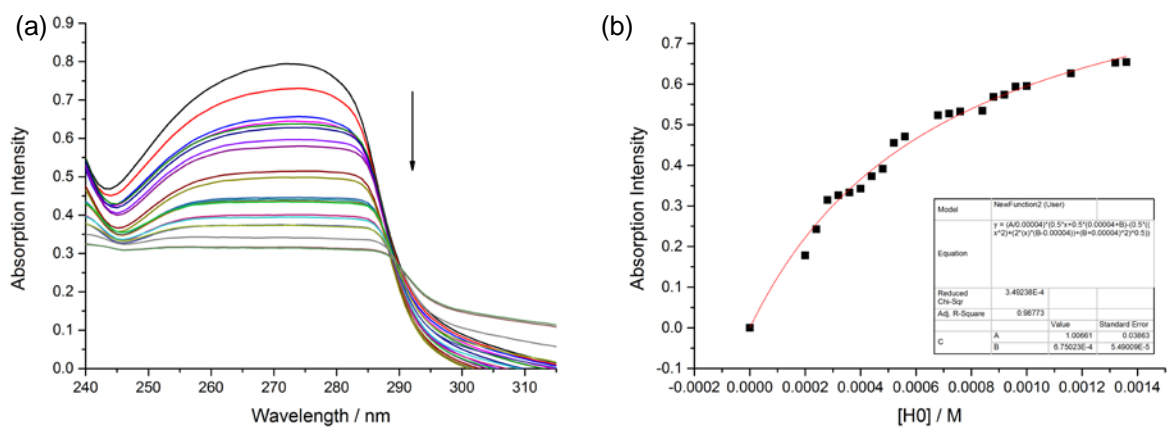

**Fig. S28** (a) The absorption spectral changes of **1a** (0.04 mM) upon the addition of **DB30C10** and (b) the absorption intensity changes at  $\lambda = 270$  nm upon the addition of **DB30C10**.

## 9. Crystal structure of **1b**

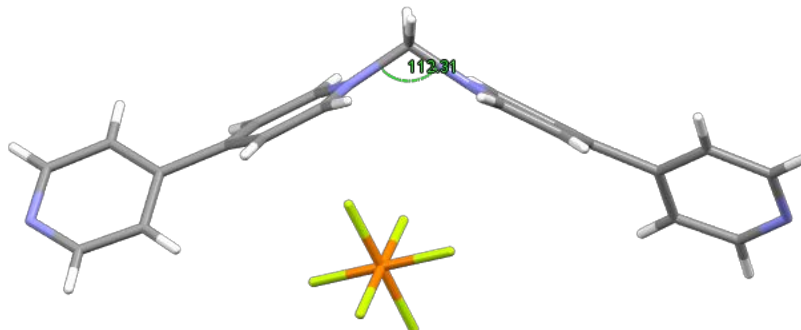

**Fig. S29** Crystal structure of 1,1-bis(bipyridinium)methane **1b** reported by Peinador et al. (*J. Am. Chem. Soc.*, 2007, **129**, 13978–13986.)

## 10. NMR spectra of [3]catenanes by using one-pot construction method

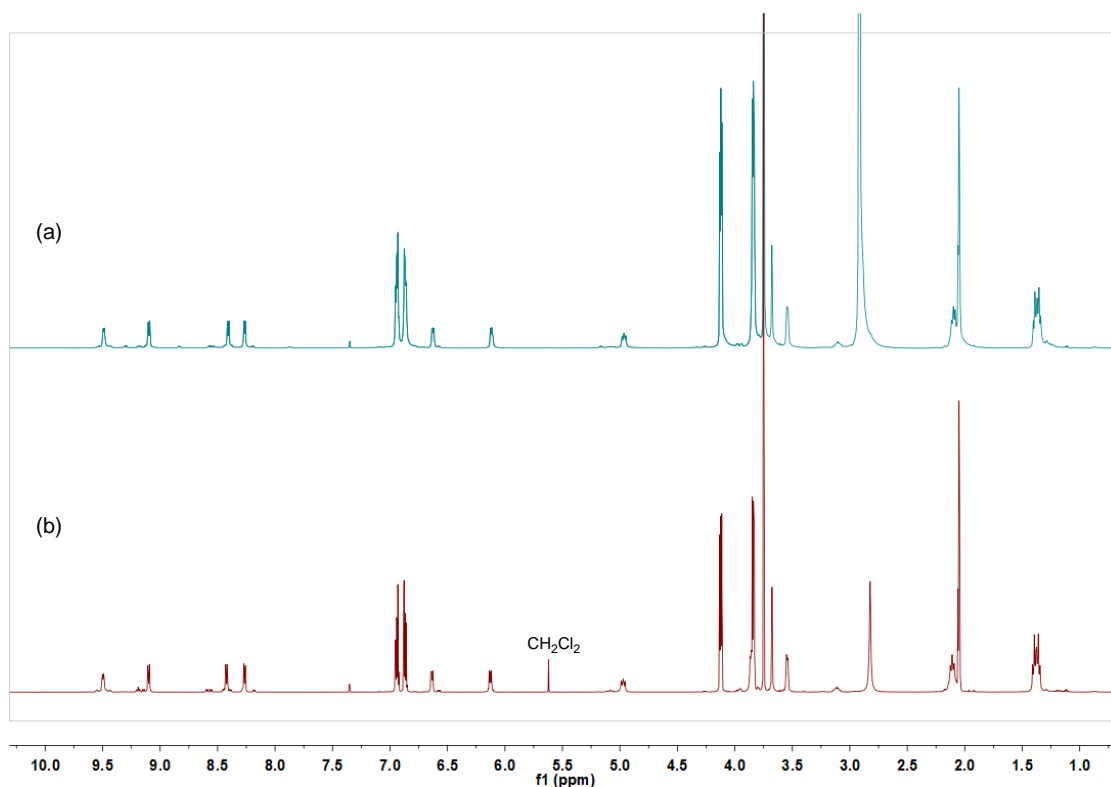

**Fig. S30** <sup>1</sup>H NMR spectra (500 MHz, acetone-*d*<sub>6</sub>, 25 °C) of [3]catenane **3** (a) self-assembly followed by threading (**2a** + DB24C8), (b) one-pot reaction (**1a** + **6** + DB24C8).

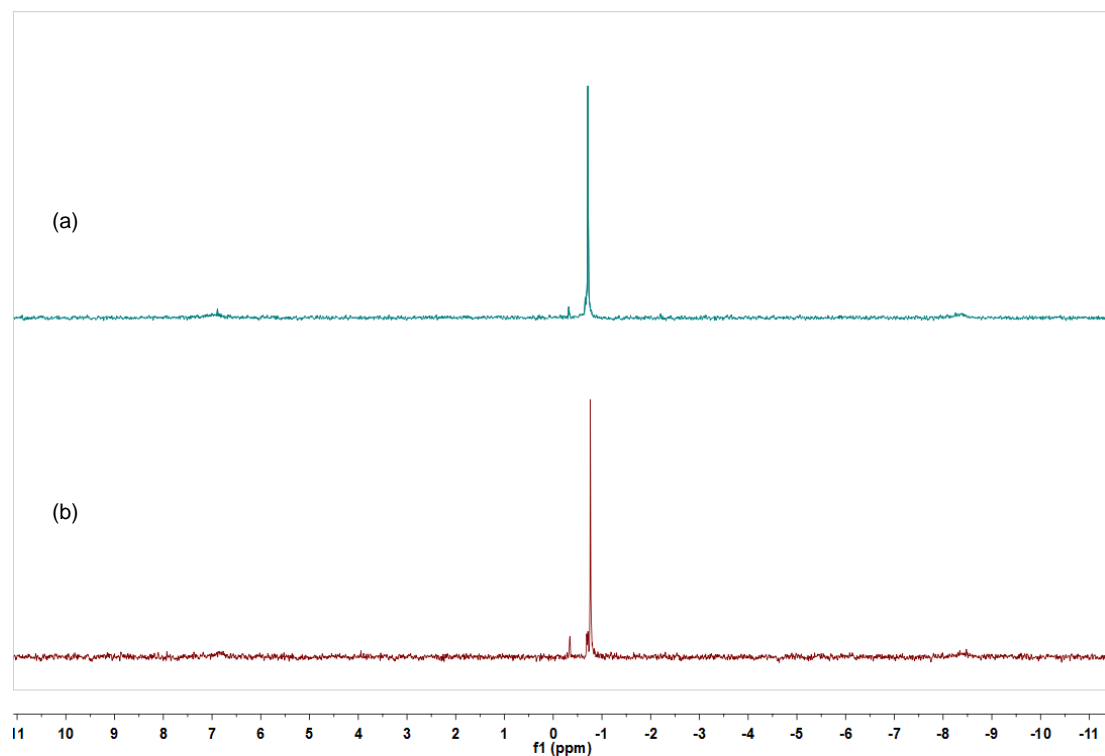

**Fig. S31**  $^{31}\text{P}\{^1\text{H}\}$  NMR spectra (202 MHz, acetone- $d_6$ , 25 °C) of [3]catenane **3** (a) self-assembly followed by threading (**2a** + DB24C8), (b) one-pot reaction (**1a** + **6** + DB24C8).

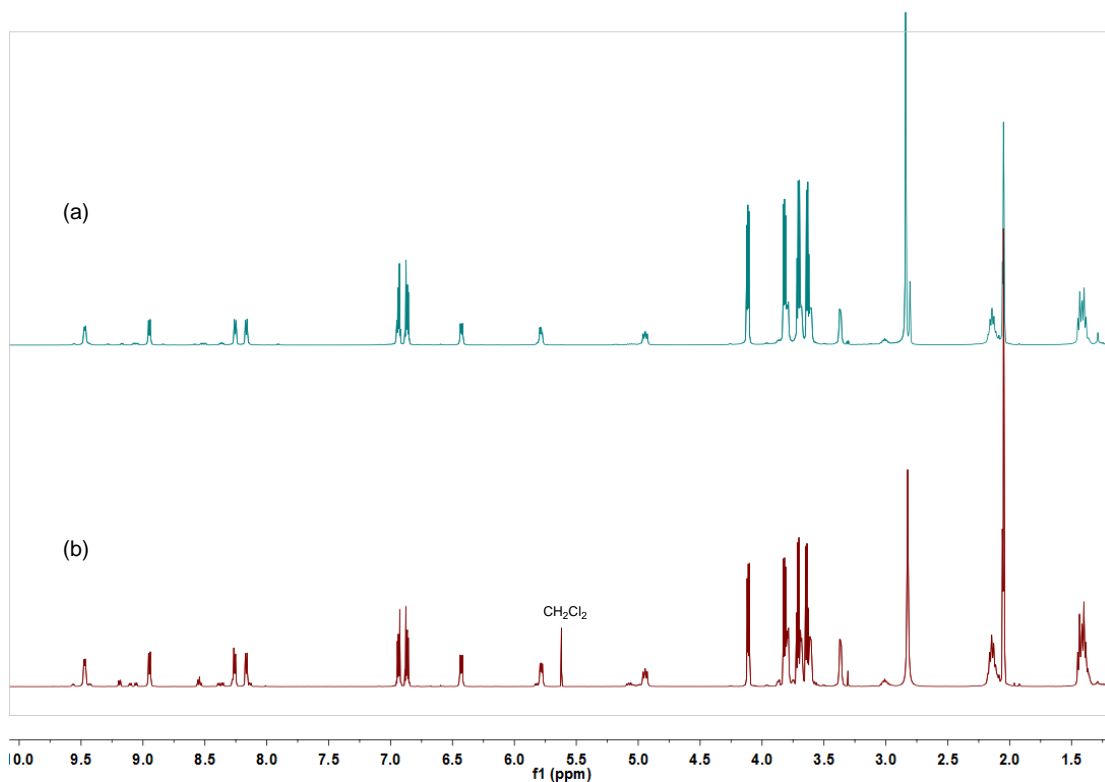

**Fig. S32**  $^1\text{H}$  NMR spectra (500 MHz, acetone- $d_6$ , 25 °C) of [3]catenane **4** (a) self-assembly followed by threading (**2a** + DB30C10), (b) one-pot reaction (**1a** + **6** + DB30C10).



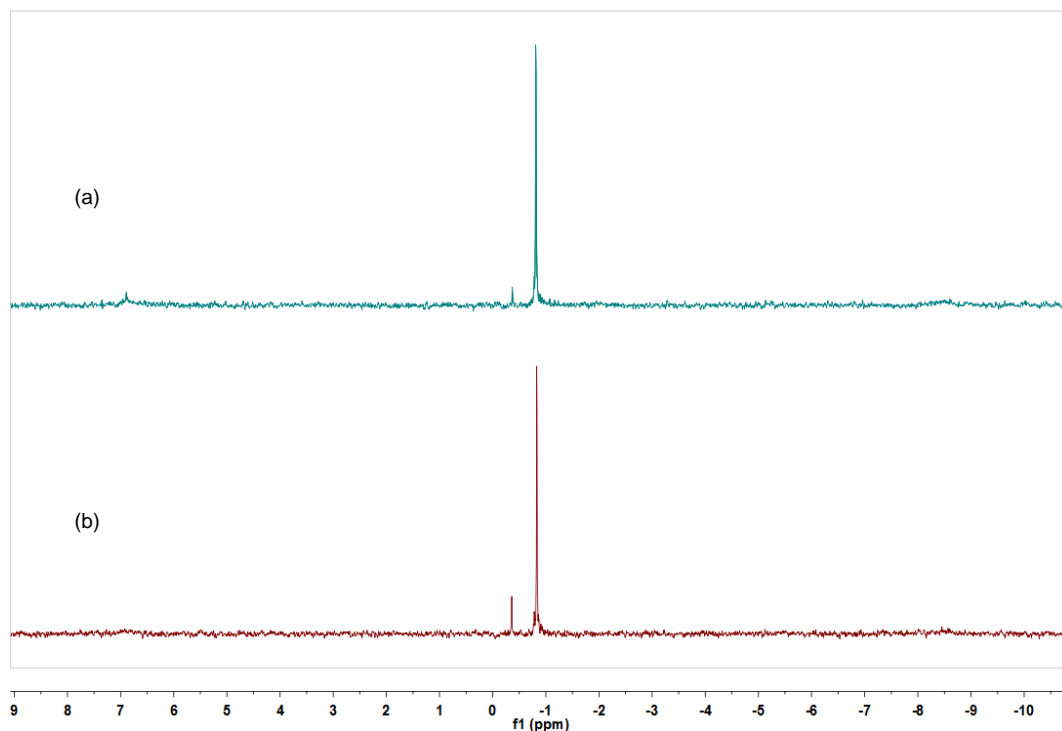

**Fig. S33**  $^{31}\text{P}\{^1\text{H}\}$  NMR spectra (202 MHz, acetone- $d_6$ , 25 °C) of [3]catenane **4** (a) self-assembly followed by threading (**2a** + DB30C10), (b) one-pot reaction (**1a** + **6** + DB30C10).

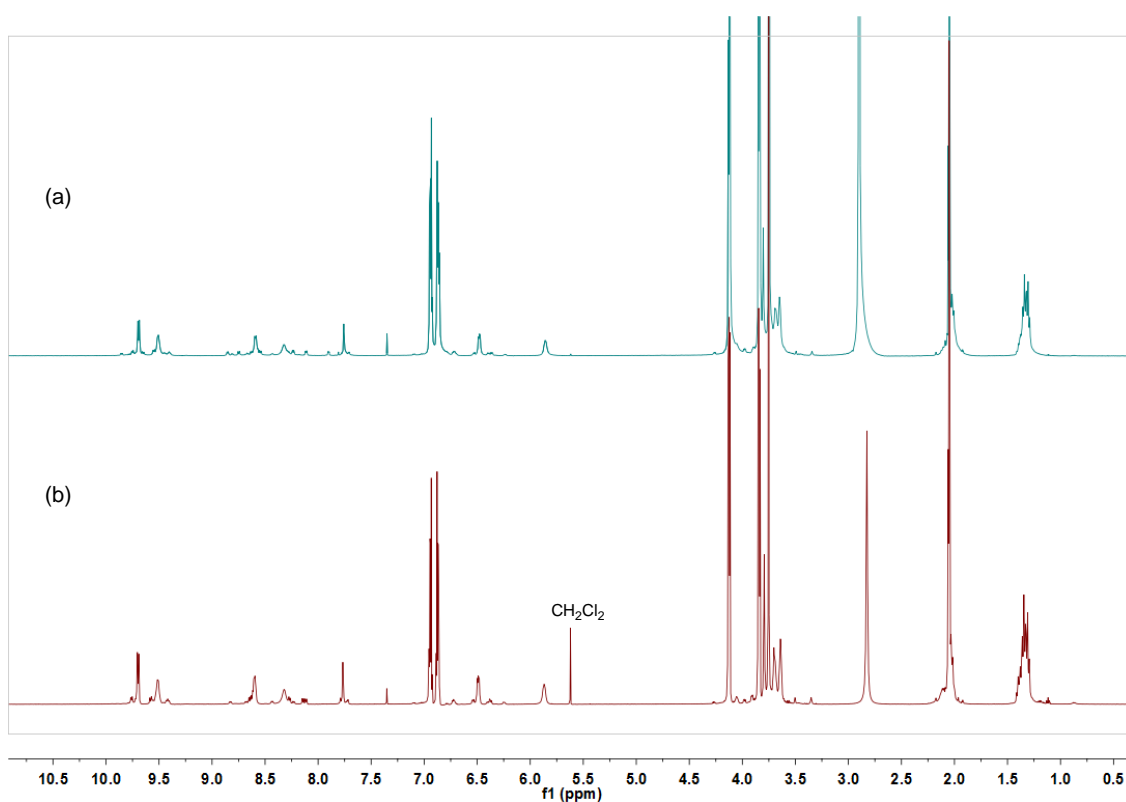

**Fig. S34**  $^1\text{H}$  NMR spectra (500 MHz, acetone- $d_6$ , 25 °C) of [3]catenane **5** (a) self-assembly followed by threading (**2b** + DB24C8), (b) one-pot reaction (**1b** + **6** + DB24C8).

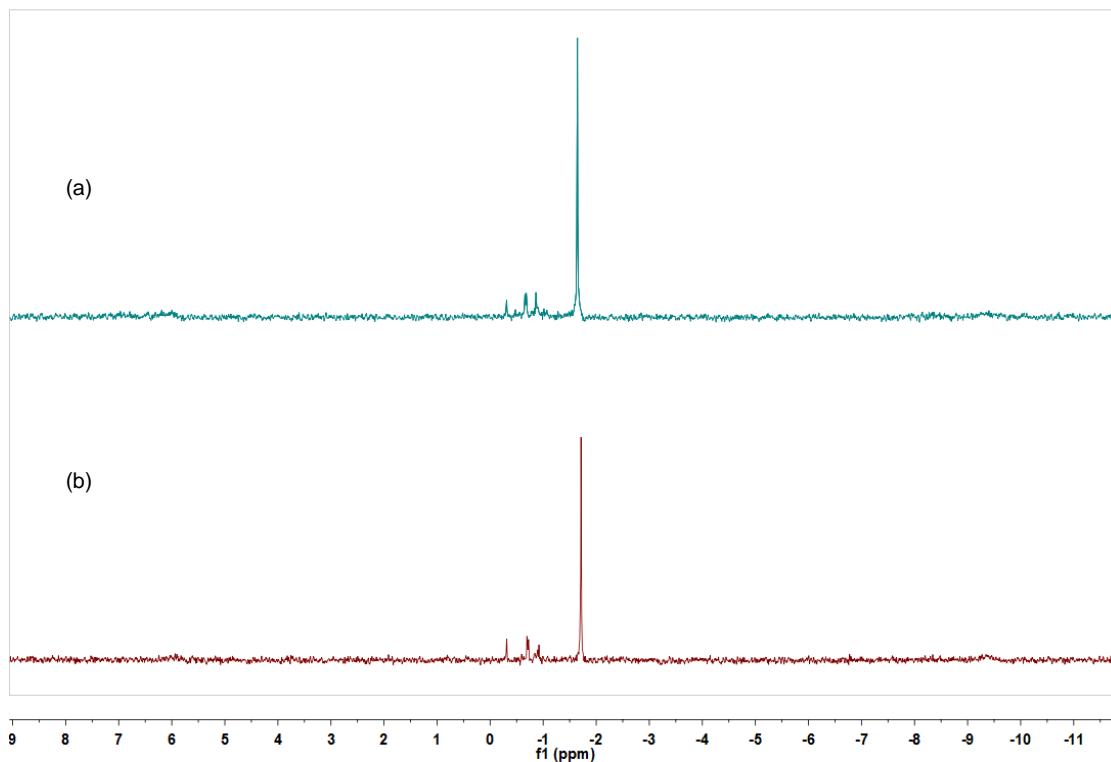

**Fig. S35**  $^{31}\text{P}\{^1\text{H}\}$  NMR spectra (202 MHz, acetone- $d_6$ , 25 °C) of [3]catenane **5** (a) self-assembly followed by threading (**2b** + DB24C8), (b) one-pot reaction (**1b** + **6** + DB24C8).

*11. Synthesis and characterization of anion-exchanged metallacycles **7**, **8** and [3]catenanes **9**, **10**, **11***

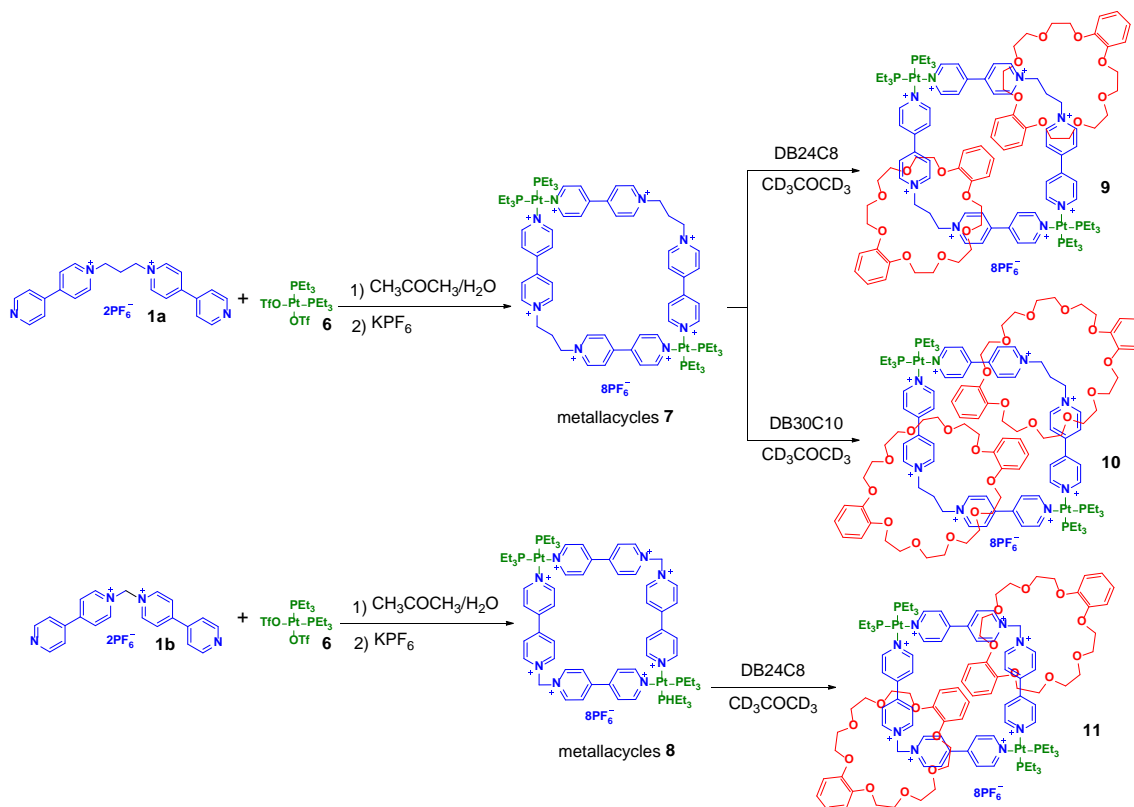

1,3-Bis(4,4'-bipyridinium)propane **1a** or 1,1-bis(4,4'-bipyridinium)methane **1b** (0.012 mmol) and 90° platinum(II) receptor **6** (0.012 mmol) were placed in a 2-dram vial, followed by addition of acetone (1.2 mL) and water (0.4 mL), the solutions were then stirred for 6 h at room temperature. A little excess KPF<sub>6</sub> in aqueous solution was added into the reaction mixture. Acetone was removed by N<sub>2</sub> flow. The resulted precipitate was collected by filtration and the solid was then re-dissolved in acetone (1.0 mL). Water (1.0 mL) was added into the solution and acetone was removed again by N<sub>2</sub> flow. The resulted precipitate was collected by filtration and dried under vacuum to afford metallacycle **7** (15.8 mg, 96%) or **8** (9.3 mg, 58%) as a white solid, respectively.

Corresponding crown ethers (12 mM) were added directly into a solution of metallacycle **7** or **8** (2 mM) in acetone-*d*<sub>6</sub>. The solution was then stirred for 1 days at room temperature to generate [3]catenane (**9**, **10** or **11**). This initial reaction solution was directly used for the following characterization.

Metallacycle **7**: <sup>1</sup>H NMR (500 MHz, acetone-*d*<sub>6</sub>) (Fig. S36): δ (ppm) 9.44 (d, *J* = 4.8 Hz, 8H), 9.16 (d, *J* = 7.0 Hz, 8H), 8.53 (d, *J* = 7.0 Hz, 8H), 8.25 (d, *J* = 6.6 Hz, 8H), 5.11–5.05 (m, 8H), 2.97–3.03 (m, 4H), 2.11–2.16 (m, 24H), 1.38 (dt, *J* = 17.6, 7.5 Hz, 36H). <sup>31</sup>P{<sup>1</sup>H} NMR (202 MHz, acetone-*d*<sub>6</sub>) (Fig. S37): δ (ppm) –0.11 (s, <sup>195</sup>Pt satellites, *J*<sub>Pt-P</sub> = 3110 Hz).

Metallacycle **8**: <sup>1</sup>H NMR (500 MHz, acetone-*d*<sub>6</sub>) (Fig. S38): δ (ppm) 9.80 (d, *J* = 7.1 Hz, 8H), 9.44 (d, *J* = 4.8 Hz, 8H), 8.64 (d, *J* = 7.1 Hz, 8H), 8.16 (d, *J* = 6.6 Hz, 8H), 7.85 (s, 4H), 2.13 (dt, *J* = 16.0, 7.8 Hz, 24H), 1.41–1.34 (m, 36H). <sup>31</sup>P{<sup>1</sup>H} NMR (202 MHz, acetone-*d*<sub>6</sub>) (Fig. S39): δ (ppm) –0.10 (s, <sup>195</sup>Pt satellites, *J*<sub>Pt-P</sub> = 3104 Hz).

[3]Catenane **9**: <sup>1</sup>H NMR (500 MHz, acetone-*d*<sub>6</sub>) (Fig. S40): δ (ppm) 9.46 (d, *J* = 4.8 Hz, 8H), 9.10 (d, *J* = 7.0 Hz, 8H), 8.35 (d, *J* = 7.0 Hz, 8H), 8.22 (d, *J* = 6.6 Hz, 8H), 6.61 (dd, *J* = 6.0, 3.6 Hz, 8H), 6.16 (dd, *J* = 6.1, 3.4 Hz, 8H), 5.04–4.97 (m, 8H), 3.82 (s, 16H), 3.69 (s, 16H), 3.61–3.52 (m, 16H), 3.19–3.11 (m, 4H), 2.10–2.15 (m, 24H), 1.41–1.35 (m, 36H). <sup>31</sup>P{<sup>1</sup>H} NMR (202 MHz, acetone-*d*<sub>6</sub>) (Fig. S41): δ (ppm) –0.66 (s, <sup>195</sup>Pt satellites, *J*<sub>Pt-P</sub> = 3112 Hz).

[3]Catenane **10**: <sup>1</sup>H NMR (500 MHz, acetone-*d*<sub>6</sub>) (Fig. S42): δ (ppm) 9.44 (d, *J* = 4.9 Hz, 8H), 8.95 (d, *J* = 6.8 Hz, 8H), 8.18 (d, *J* = 6.8 Hz, 8H), 8.11 (d, *J* = 6.5 Hz, 8H), 6.39 (dd, *J* = 5.9, 3.6 Hz, 8H), 5.81 (dd, *J* = 5.9, 3.4 Hz, 8H), 4.99–4.91 (m, 8H), 3.79 (d, *J* = 5.4 Hz, 16H), 3.69 (d, *J* = 2.0 Hz,

16H), 3.58 (d,  $J = 4.8$  Hz, 16H), 3.37 (d,  $J = 2.9$  Hz, 16H), 3.04–2.98 (m, 4H), 2.15 (dd,  $J = 15.9, 7.2$  Hz, 25H), 1.44–1.38 (m, 36H).  $^{31}\text{P}\{^1\text{H}\}$  NMR (202 MHz, acetone- $d_6$ ) (Fig. S43):  $\delta$  (ppm)  $-0.69$  (s,  $^{195}\text{Pt}$  satellites,  $J_{\text{Pt-P}} = 3108$  Hz).

[3]Catenane **11**:  $^1\text{H}$  NMR (500 MHz, acetone- $d_6$ ) (Fig. S44):  $\delta$  (ppm) 9.72 (d,  $J = 6.7$  Hz, 8H), 9.47 (d,  $J = 4.2$  Hz, 8H), 8.54 (d,  $J = 6.3$  Hz, 8H), 8.26 (s, 8H), 7.80 (s, 4H), 6.52–6.41 (m, 8H), 5.89 (s, 8H), 3.80 (s, 16H), 3.68 (d,  $J = 4.9$  Hz, 16H), 3.65 (s, 16H), 2.04–1.96 (m, 24H), 1.36–1.30 (m, 36H).  $^{31}\text{P}\{^1\text{H}\}$  NMR (202 MHz, acetone- $d_6$ ) (Fig. S45):  $\delta$  (ppm)  $-1.65$  (s,  $^{195}\text{Pt}$  satellites,  $J_{\text{Pt-P}} = 3131$  Hz).

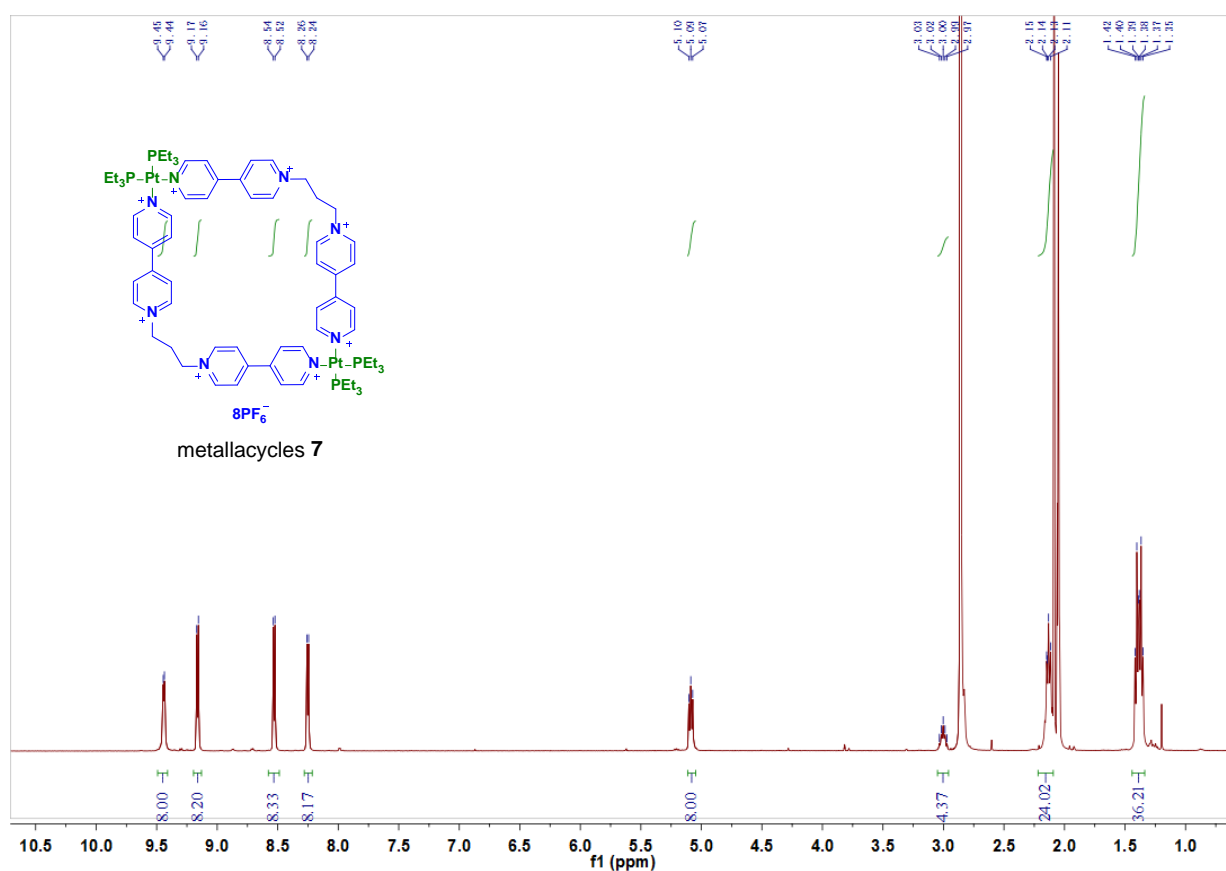

**Fig. S36**  $^1\text{H}$  NMR (500 MHz, acetone- $d_6$ , 25 °C) spectrum of metallacycle **7**.

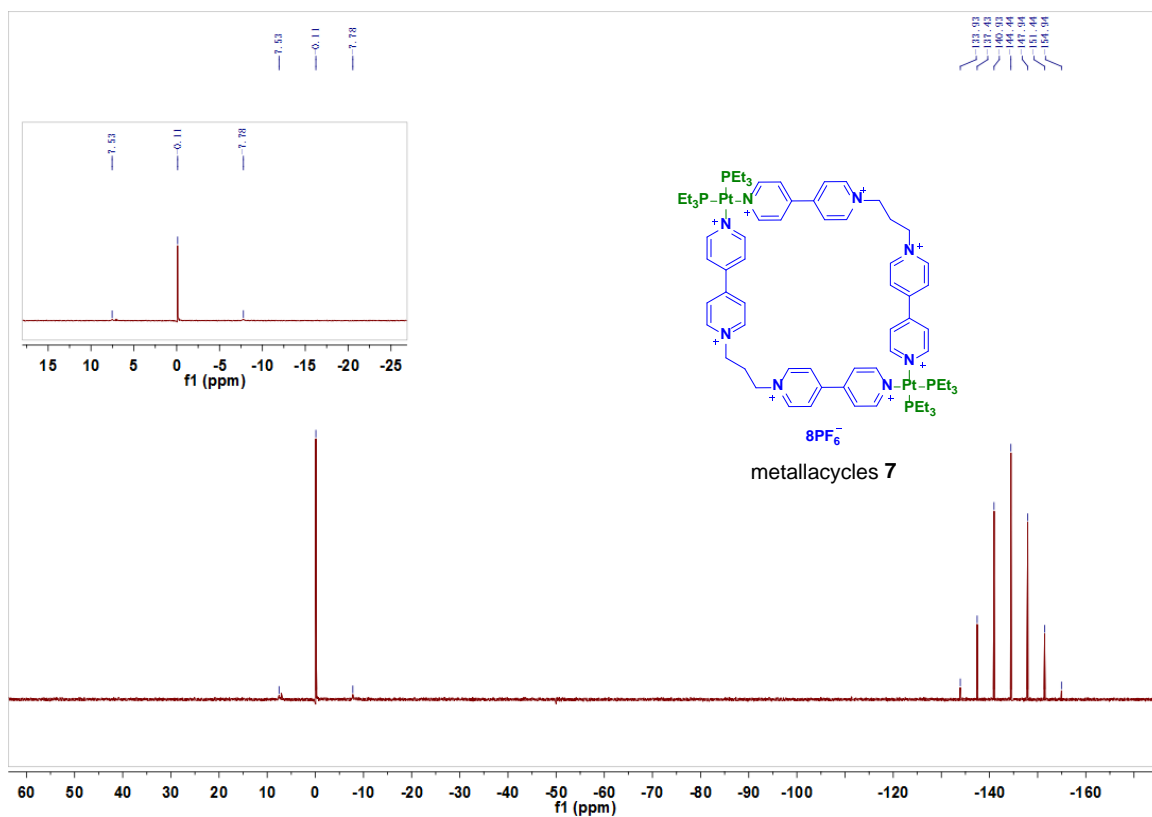

**Fig. S37** <sup>31</sup>P{<sup>1</sup>H} NMR (202 MHz, acetone-*d*<sub>6</sub>, 25 °C) spectrum of metallacycle **7**.

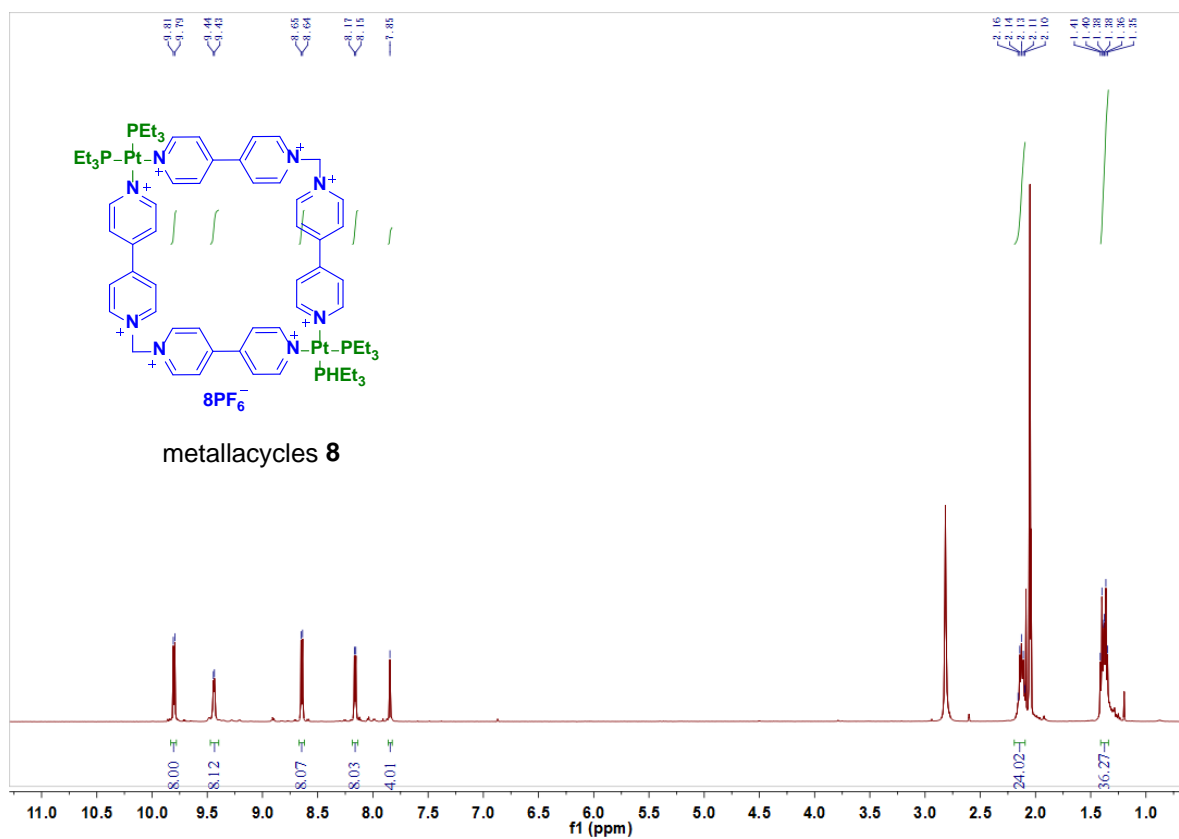

**Fig. S38** <sup>1</sup>H NMR (500 MHz, acetone-*d*<sub>6</sub>, 25 °C) spectrum of metallacycle **8**.

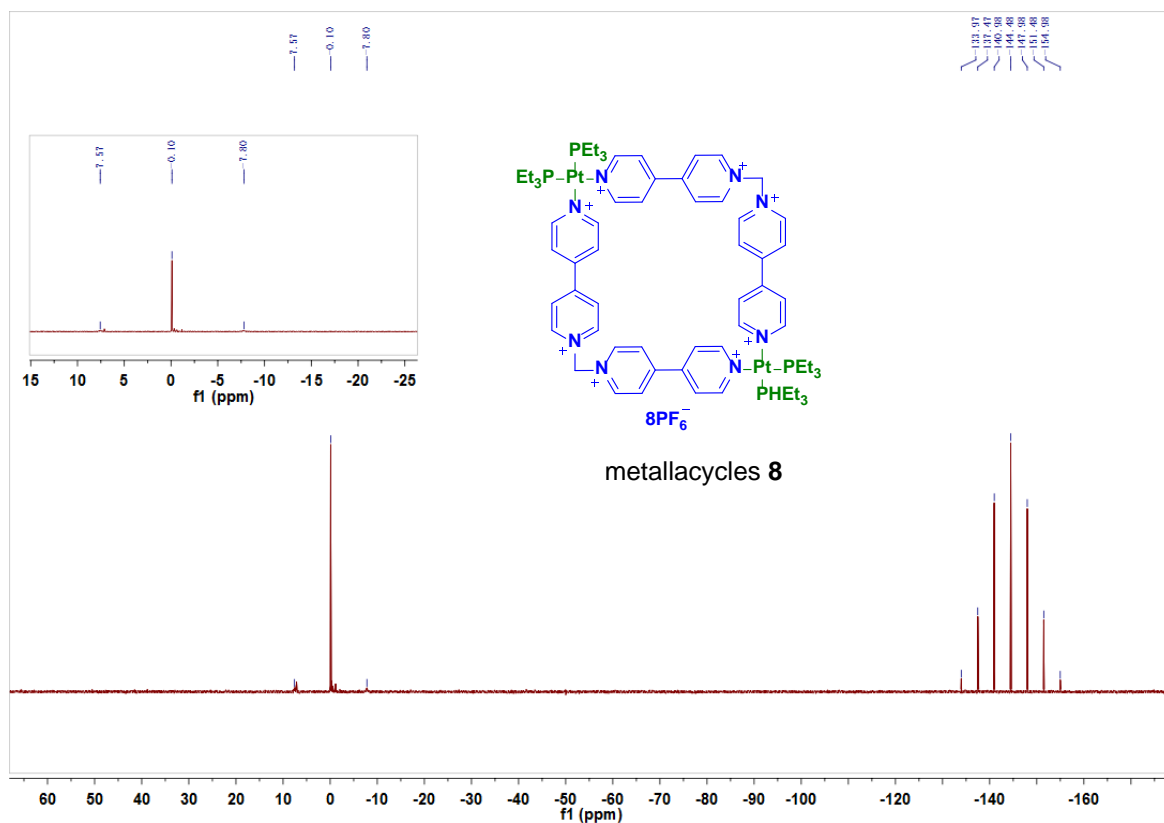

**Fig. S39**  $^{31}\text{P}\{^1\text{H}\}$  NMR (202 MHz, acetone- $d_6$ , 25 °C) spectrum of metallacycle **8**.

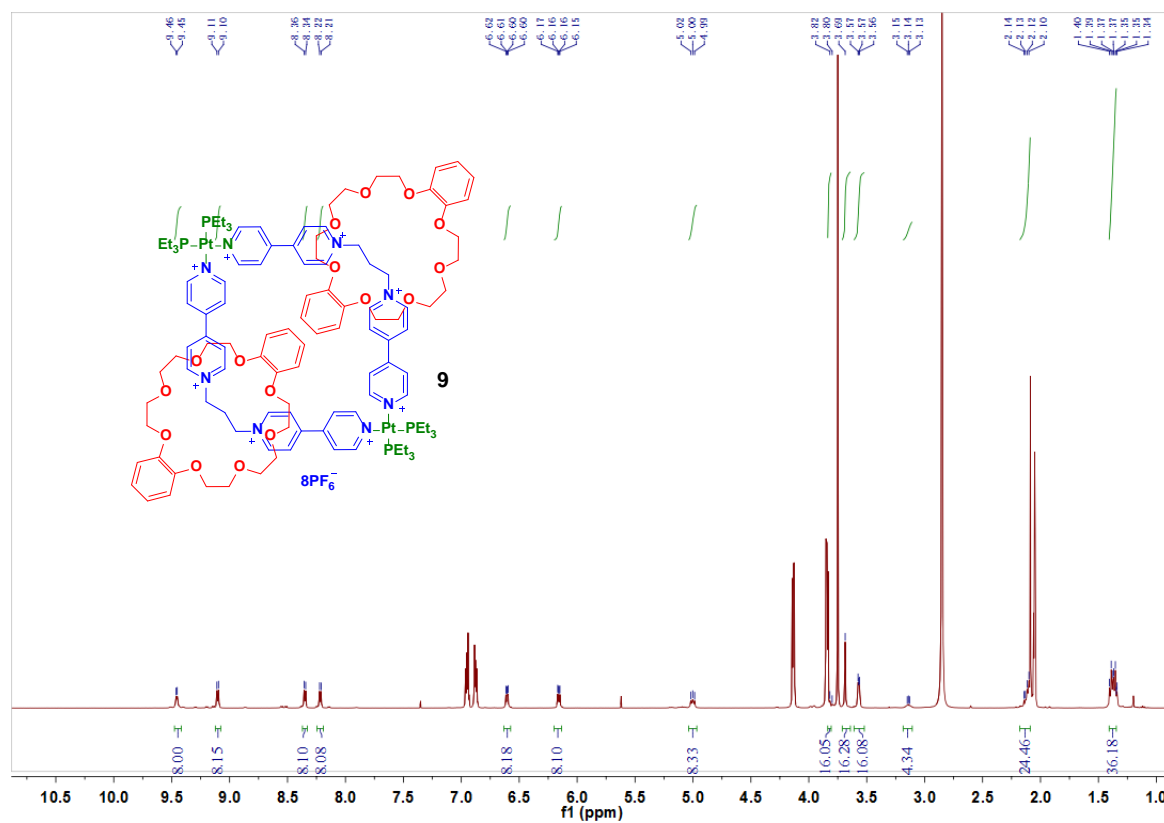

**Fig. S40**  $^1\text{H}$  NMR (500 MHz, acetone- $d_6$ , 25 °C) spectrum of [3]catenane **9**.

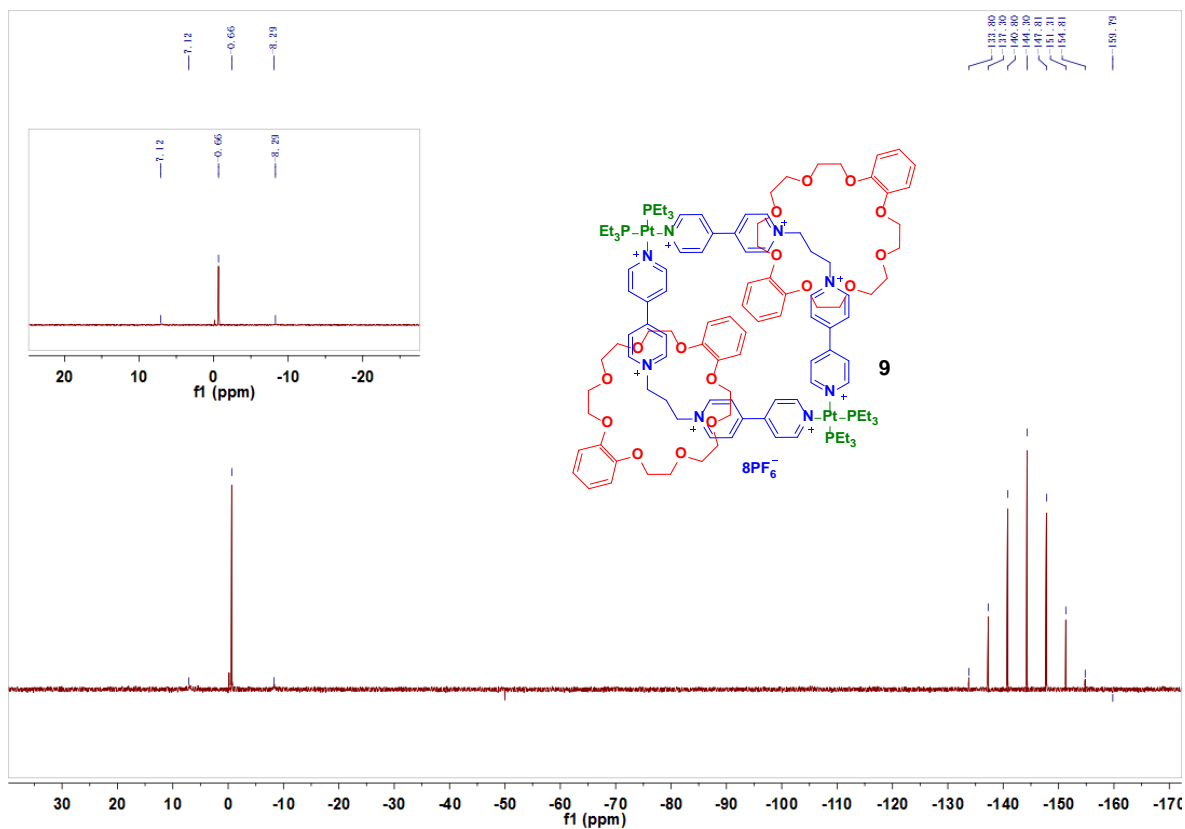

Fig. S41  $^{31}P\{^1H\}$  NMR (202 MHz, acetone- $d_6$ , 25 °C) spectrum of [3]catenane **9**.

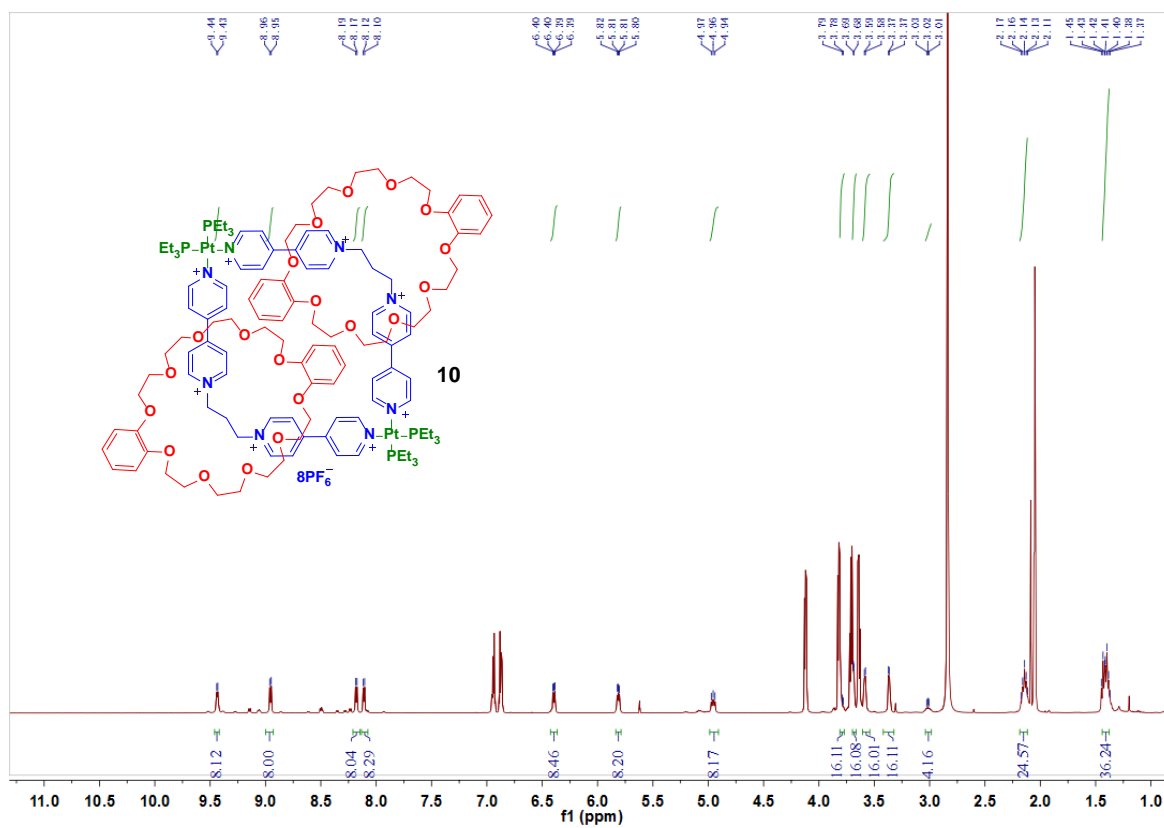

Fig. S42  $^1H$  NMR (500 MHz, acetone- $d_6$ , 25 °C) spectrum of [3]catenane **10**.

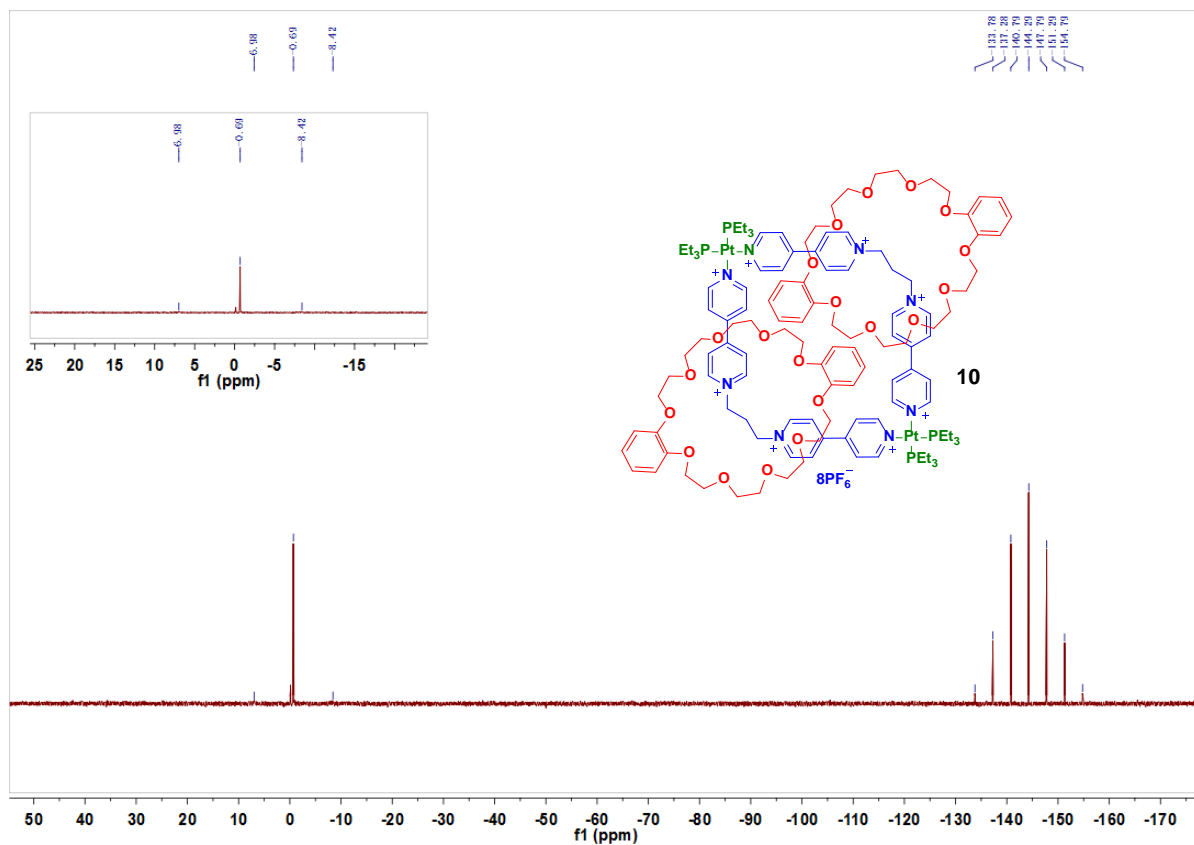

**Fig. S43**  $^{31}\text{P}\{^1\text{H}\}$  NMR (202 MHz, acetone- $d_6$ , 25 °C) spectrum of [3]catenane **10**.

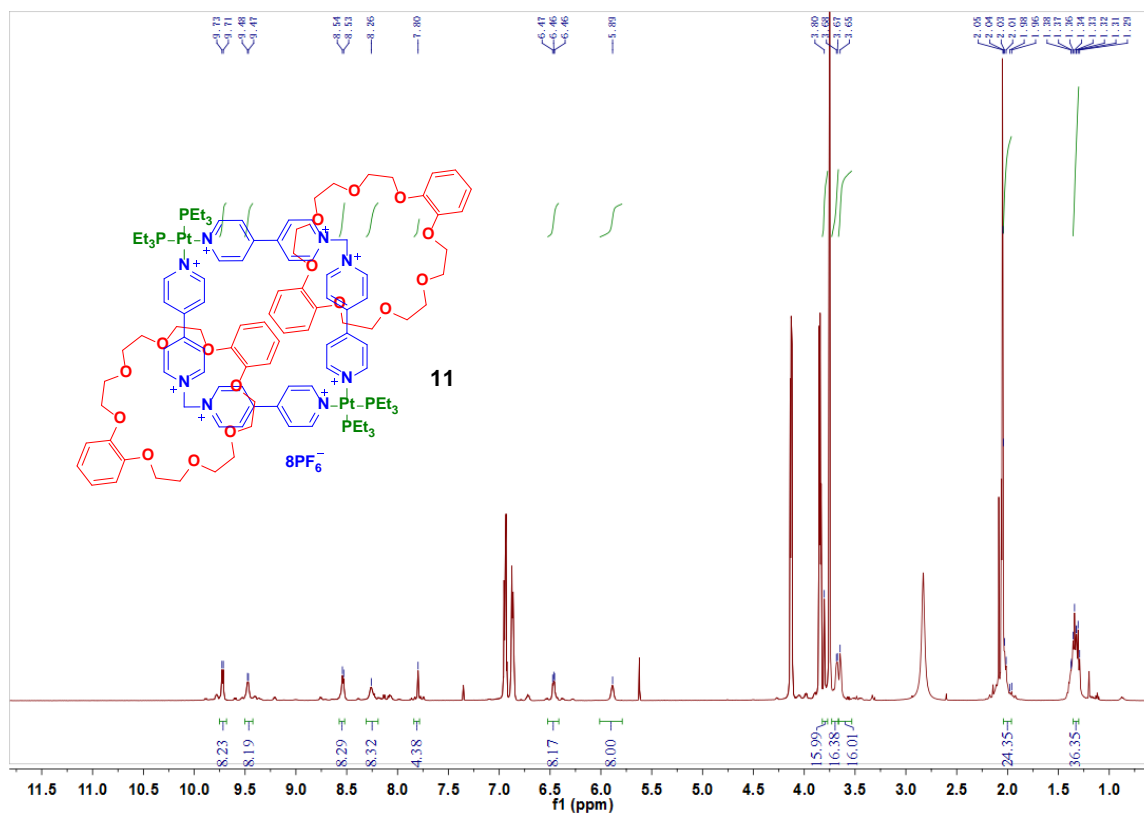

**Fig. S44**  $^1\text{H}$  NMR (500 MHz, acetone- $d_6$ , 25 °C) spectrum of [3]catenane **11**.



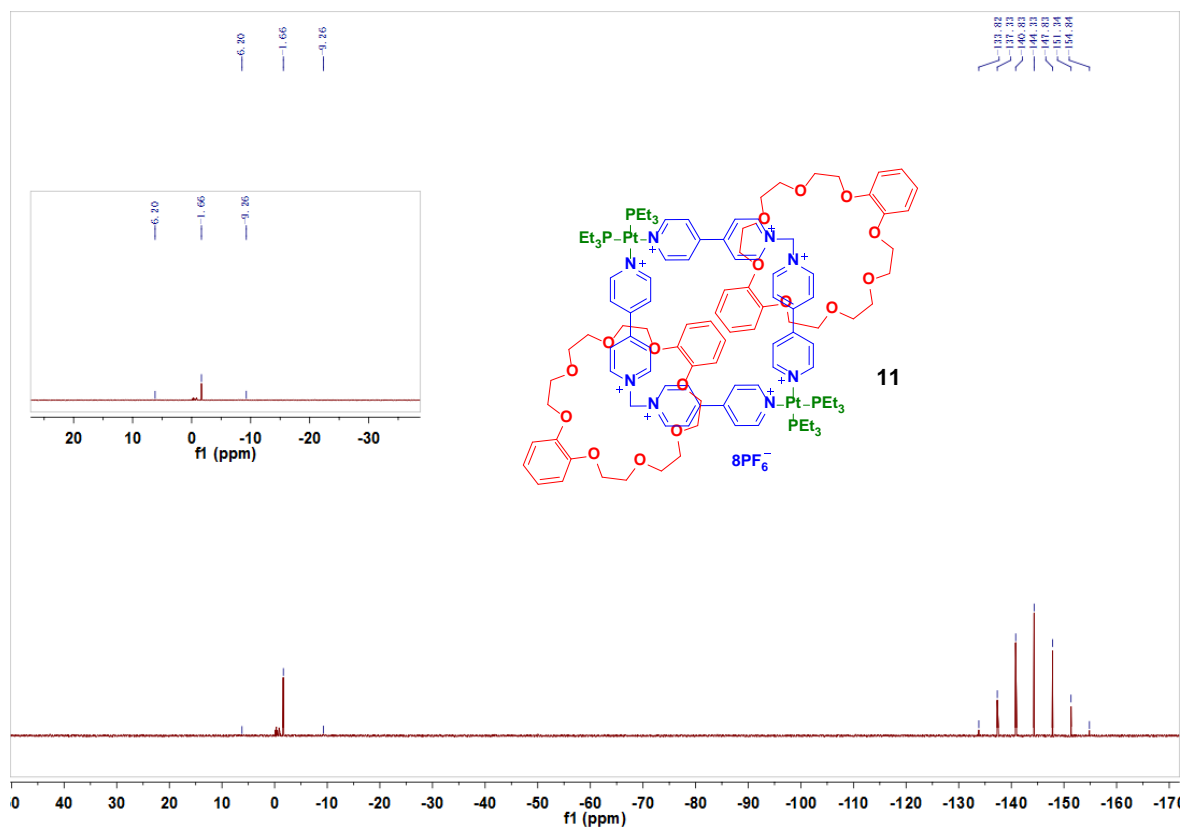

Fig. S45 <sup>31</sup>P{<sup>1</sup>H} NMR (202 MHz, acetone-d<sub>6</sub>, 25 °C) spectrum of [3]catenane **11**.

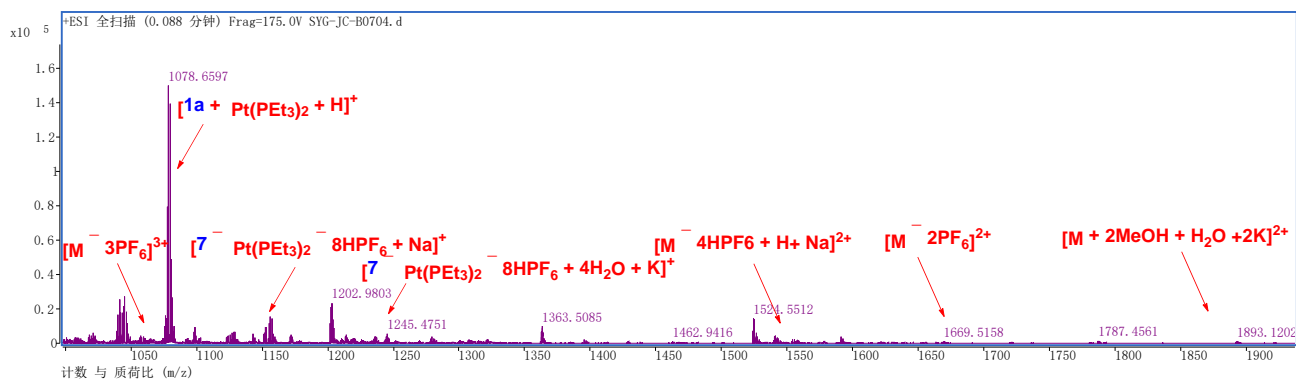

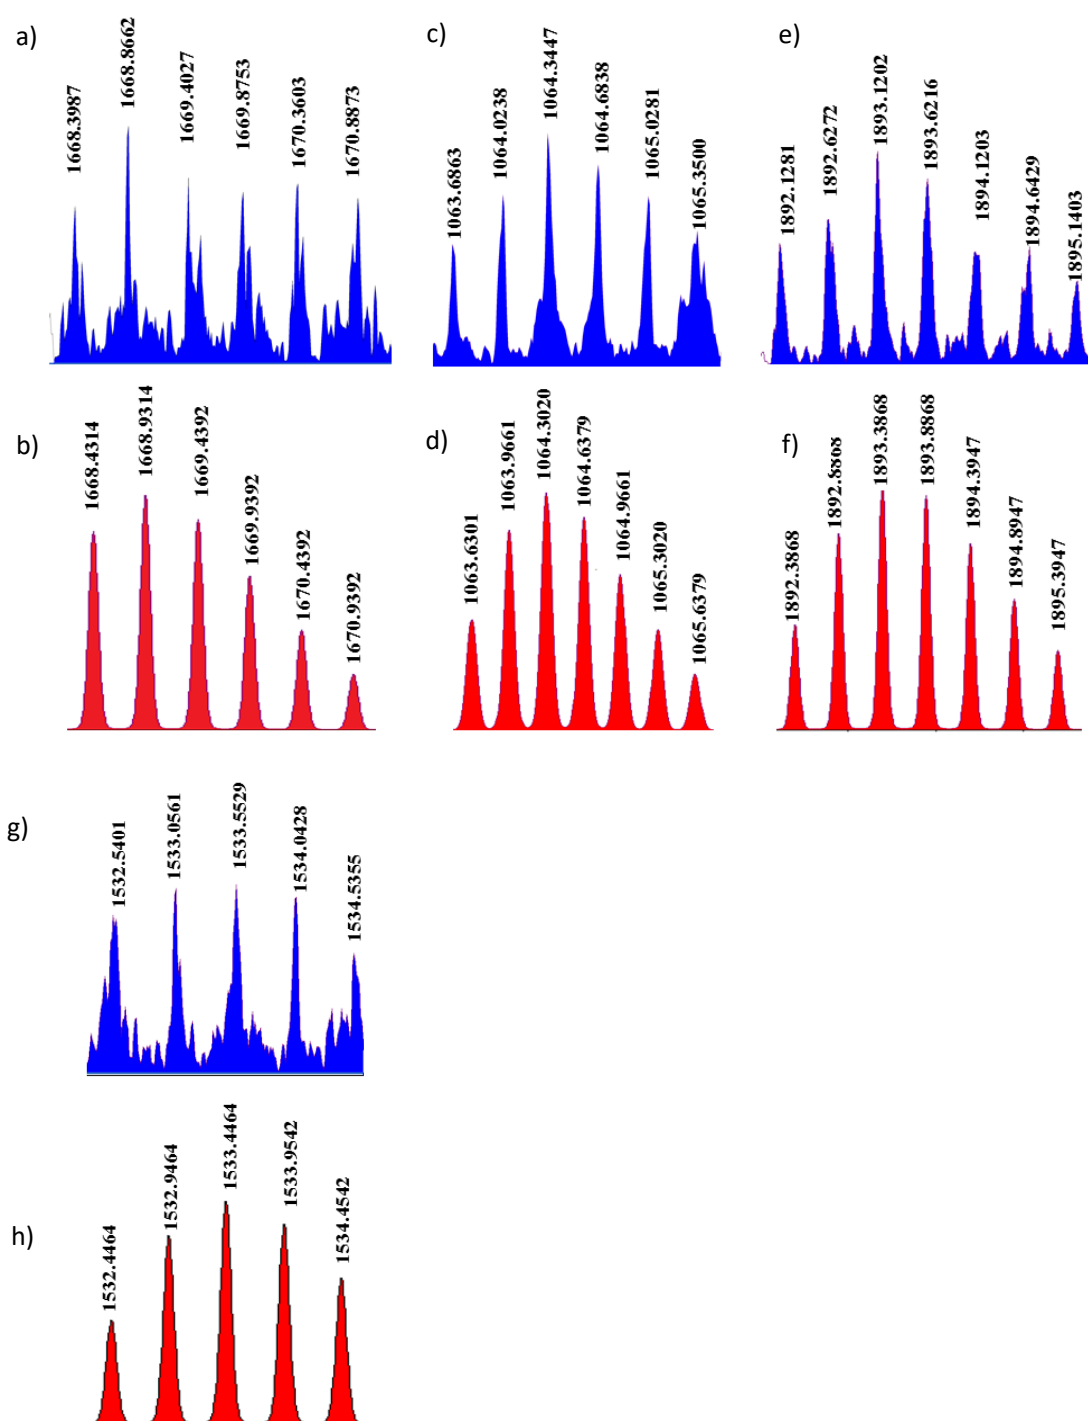

**Fig. S46** ESI-MS spectrum of **9**. a) experimental spectrum of  $[\mathbf{9} - 2\text{PF}_6]^{2+}$  ( $m/z = 1668.8662$ ); b) simulated spectrum of  $[\mathbf{9} - 2\text{PF}_6]^{2+}$  ( $m/z = 1668.9314$ ); c) experimental spectrum of  $[\mathbf{9} - 3\text{PF}_6]^{3+}$  ( $m/z = 1064.3447$ ); d) simulated spectrum of  $[\mathbf{9} - 3\text{PF}_6]^{3+}$  ( $m/z = 1064.3020$ ); e) experimental spectrum of  $[\mathbf{9} + 2\text{MeOH} + \text{H}_2\text{O} + 2\text{K}]^{2+}$  ( $m/z = 1893.1202$ ); f) simulated spectrum of  $[\mathbf{9} + 2\text{MeOH} + \text{H}_2\text{O} + 2\text{K}]^{2+}$  ( $m/z = 1893.3868$ ); g) experimental spectrum of  $[\mathbf{9} - 4\text{HPF}_6 + \text{H} + \text{Na}]^{2+}$  ( $m/z = 1533.5529$ ); h) simulated spectrum of  $[\mathbf{9} - 4\text{HPF}_6 + \text{H} + \text{Na}]^{2+}$  ( $m/z = 1533.4464$ ).

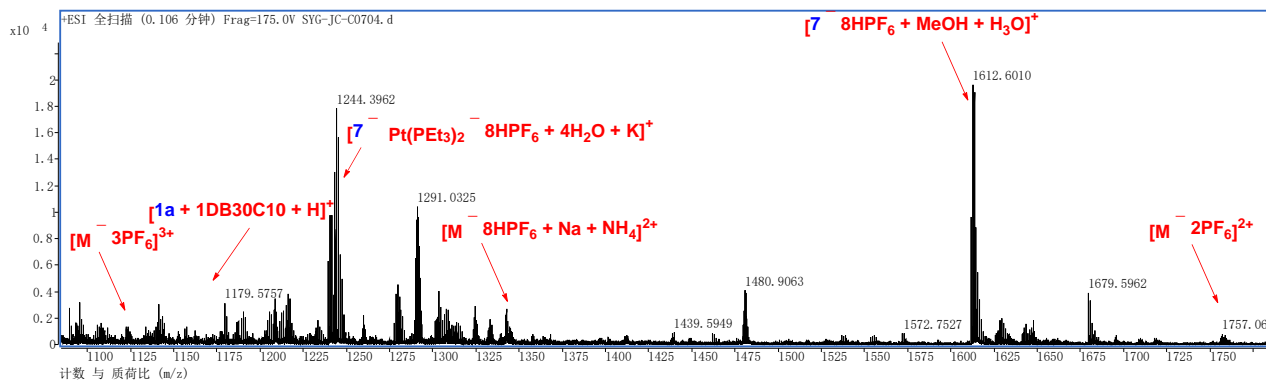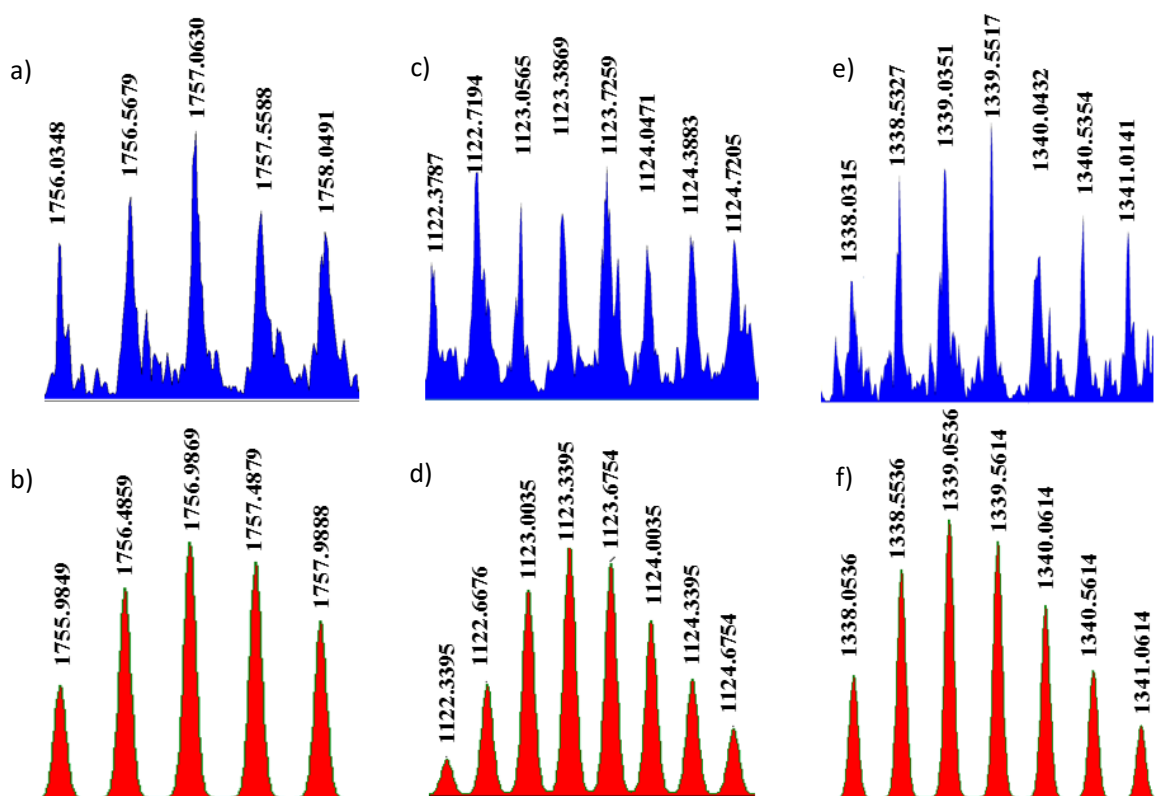

**Fig. S47** ESI-MS spectrum of **10**. a) experimental spectrum of  $[10 - 2PF_6]^{2+}$  ( $m/z = 1757.0630$ ); b) simulated spectrum of  $[10 - 2PF_6]^{2+}$  ( $m/z = 1756.9869$ ); c) experimental spectrum of  $[10 - 3PF_6]^{3+}$  ( $m/z = 1122.7149$ ); d) simulated spectrum of  $[10 - 3PF_6]^{3+}$  ( $m/z = 1122.6676$ ); e) experimental spectrum of  $[10 - 8HPF_6 + Na + NH_4]^{2+}$  ( $m/z = 1339.5517$ ); f) simulated spectrum of  $[10 - 8HPF_6 + Na + NH_4]^{2+}$  ( $m/z = 1339.0536$ ).

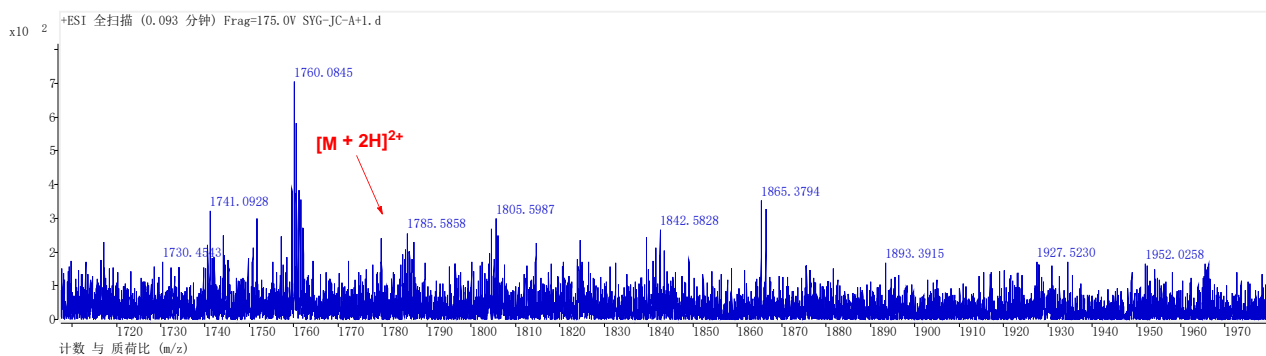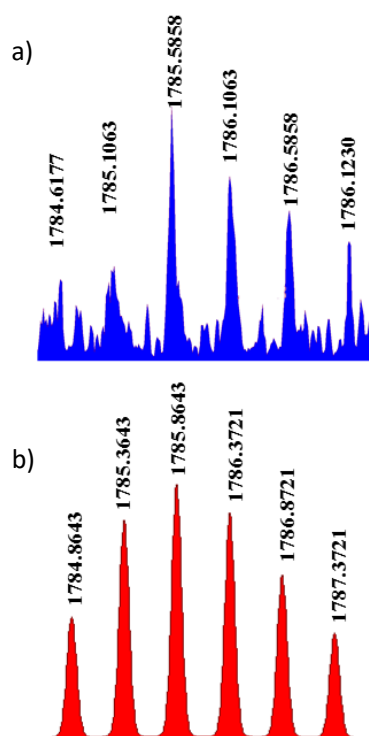

**Fig. S48** ESI-MS spectrum of **11**. a) experimental spectrum of  $[\mathbf{11} + 2\text{H}]^{2+}$  ( $m/z = 1785.5858$ ); b) simulated spectrum of  $[\mathbf{11} + 2\text{H}]^{2+}$  ( $m/z = 1785.8643$ ).

12. X-ray analysis data of **1a** and [3]catenane **4**

| Compounds                                             | Guest <b>1a</b>                                                               | [3]catenane <b>4</b>                                                                                             |
|-------------------------------------------------------|-------------------------------------------------------------------------------|------------------------------------------------------------------------------------------------------------------|
| Empirical formula                                     | C <sub>23</sub> H <sub>22</sub> F <sub>12</sub> N <sub>4</sub> P <sub>2</sub> | C <sub>126</sub> H <sub>184</sub> F <sub>48</sub> N <sub>8</sub> O <sub>20</sub> P <sub>12</sub> Pt <sub>2</sub> |
| Formula weight                                        | 644.38                                                                        | 3804.62                                                                                                          |
| Temperature [K]                                       | 170.0                                                                         | 170.0                                                                                                            |
| Crystal system                                        | Monoclinic                                                                    | Triclinic                                                                                                        |
| Space group                                           | <i>P</i> <sub>2</sub> <sub>1</sub> / <i>c</i>                                 | <i>P</i> -1                                                                                                      |
| <i>a</i> [Å]                                          | 7.1855(5)                                                                     | 10.1341(4)                                                                                                       |
| <i>b</i> [Å]                                          | 14.1620(8)                                                                    | 21.2668(8)                                                                                                       |
| <i>c</i> [Å]                                          | 25.8378(19)                                                                   | 22.2187(9)                                                                                                       |
| $\alpha$ [°]                                          | 90                                                                            | 62.6960(10)                                                                                                      |
| $\beta$ [°]                                           | 90.229(2)                                                                     | 78.8210(10)                                                                                                      |
| $\gamma$ [°]                                          | 90                                                                            | 76.6310(10)                                                                                                      |
| Volume [Å <sup>3</sup> ]                              | 2629.3(3)                                                                     | 4118.3(3)                                                                                                        |
| <i>Z</i>                                              | 4                                                                             | 1                                                                                                                |
| Density [Mg/m <sup>3</sup> ]                          | 1.628                                                                         | 1.534                                                                                                            |
| Absorption coefficient [mm <sup>-1</sup> ]            | 0.273                                                                         | 1.927                                                                                                            |
| <i>F</i> [000]                                        | 1304.0                                                                        | 1924.0                                                                                                           |
| Crystal size [mm <sup>3</sup> ]                       | 0.36 × 0.18 × 0.07                                                            | 0.42 × 0.16 × 0.12                                                                                               |
| Radiation                                             | MoK $\alpha$ ( $\lambda$ = 0.71073)                                           | MoK $\alpha$ ( $\lambda$ = 0.71073)                                                                              |
| 2 $\theta$ range for data collection [°]              | 4.268 to 64.622                                                               | 4.148 to 54.276                                                                                                  |
| Index ranges                                          | -10 ≤ <i>h</i> ≤ 10,<br>-21 ≤ <i>k</i> ≤ 21,<br>0 ≤ <i>l</i> ≤ 38             | -12 ≤ <i>h</i> ≤ 12,<br>-27 ≤ <i>k</i> ≤ 27,<br>-28 ≤ <i>l</i> ≤ 28                                              |
| Reflections collected                                 | 8371                                                                          | 101992                                                                                                           |
| Independent reflections                               | 8371 [R <sub>int</sub> = ?, R <sub>sigma</sub> = 0.0633]                      | 18164 [R <sub>int</sub> = 0.0464, R <sub>sigma</sub> = 0.0321]                                                   |
| Data/restraints/parameters                            | 8371/6/426                                                                    | 18164/39/1010                                                                                                    |
| Goodness-of-fit on <i>F</i> <sup>2</sup>              | 1.021                                                                         | 1.018                                                                                                            |
| Final R indexes [ <i>I</i> > 2 $\sigma$ ( <i>I</i> )] | <i>R</i> <sub>1</sub> = 0.0743, <i>wR</i> <sub>2</sub> = 0.1856               | <i>R</i> <sub>1</sub> = 0.0483, <i>wR</i> <sub>2</sub> = 0.1220                                                  |
| Final R indexes (all data)                            | <i>R</i> <sub>1</sub> = 0.1175, <i>wR</i> <sub>2</sub> = 0.2196               | <i>R</i> <sub>1</sub> = 0.0624, <i>wR</i> <sub>2</sub> = 0.1331                                                  |
| Largest diff. peak and hole [e.Å <sup>-3</sup> ]      | 0.91/-0.63                                                                    | 1.68/-1.61                                                                                                       |
| <b>Deposition Number</b>                              | <b>2079026</b>                                                                | <b>2079027</b>                                                                                                   |
